# Supplementary material for: Effects of epidural analgesia on cancer recurrence and long-term mortality in patients after non-small-cell lung cancer resection: a propensity score-matched study
Source: PubMed Central journal article supplement — BMJ Open. 2019 May 30;9(5):e027618. doi: 10.1136/bmjopen-2018-027618 (PMC6549742; doi:10.1136/bmjopen-2018-027618), 2019-05-30
Supplement: bmjopen-2018-027618.draft_revisions.pdf [file bmjopen-2018-027618.draft_revisions.pdf]

# BMJ Open

BMJ Open is committed to open peer review. As part of this commitment we make the peer review history of every article we publish publicly available.

When an article is published we post the peer reviewers' comments and the authors' responses online. We also post the versions of the paper that were used during peer review. These are the versions that the peer review comments apply to.

The versions of the paper that follow are the versions that were submitted during the peer review process. They are not the versions of record or the final published versions. They should not be cited or distributed as the published version of this manuscript.

BMJ Open is an open access journal and the full, final, typeset and author-corrected version of record of the manuscript is available on our site with no access controls, subscription charges or pay-per-view fees (<http://bmjopen.bmj.com>).

If you have any questions on BMJ Open's open peer review process please email [info.bmjopen@bmj.com](mailto:info.bmjopen@bmj.com)

# BMJ Open

## The Effects of Epidural Analgesia on Cancer Recurrence and Long-term Mortality in Patients after Non-small-cell Lung Cancer Resection: A Propensity Score-matched Study

|                               |                                                                                                                                                                                                                                                                                                                                                                                                                                                                                                                                                                                                    |
|-------------------------------|----------------------------------------------------------------------------------------------------------------------------------------------------------------------------------------------------------------------------------------------------------------------------------------------------------------------------------------------------------------------------------------------------------------------------------------------------------------------------------------------------------------------------------------------------------------------------------------------------|
| Journal:                      | <i>BMJ Open</i>                                                                                                                                                                                                                                                                                                                                                                                                                                                                                                                                                                                    |
| Manuscript ID                 | bmjopen-2018-027618                                                                                                                                                                                                                                                                                                                                                                                                                                                                                                                                                                                |
| Article Type:                 | Research                                                                                                                                                                                                                                                                                                                                                                                                                                                                                                                                                                                           |
| Date Submitted by the Author: | 31-Oct-2018                                                                                                                                                                                                                                                                                                                                                                                                                                                                                                                                                                                        |
| Complete List of Authors:     | Tai, Ying-Hsuan; Taipei Veterans General Hospital; Taipei Medical University Shuang Ho Hospital<br>Wu, Hsiang-Ling; Taipei Veterans General Hospital; National Yang-Ming University<br>Chan, Min-Ya; Taipei Veterans General Hospital; National Taiwan Normal University<br>Tsou, Mei-Yung; Taipei Veterans General Hospital; National Yang-Ming University<br>Chen, Tony Hsiu-Hsi; National Taiwan University, Division of Biostatistics, College of Public<br>Chang, Kuang-Yi; Taipei Veterans General Hospital, Department of Anesthesiology; National Yang-Ming University, School of Medicine |
| Keywords:                     | Epidural Analgesia, Cancer, Recurrence, Mortality, Non-small-cell Lung Carcinoma, Propensity Score                                                                                                                                                                                                                                                                                                                                                                                                                                                                                                 |
|                               |                                                                                                                                                                                                                                                                                                                                                                                                                                                                                                                                                                                                    |

SCHOLARONE™  
Manuscripts

1  
2  
3  
4 **The Effects of Epidural Analgesia on Cancer Recurrence and Long-term Mortality in**  
5  
6  
7 **Patients after Non-small-cell Lung Cancer Resection: A Propensity Score-matched**  
8  
9  
10 **Study**

11  
12  
13 Ying-Hsuan Tai<sup>1,2,3,4</sup>, Hsiang-Ling Wu<sup>1,3,5</sup>, Min-Ya Chan<sup>1,6</sup>, Mei-Yung Tsou<sup>1,3</sup>, Hsiu-Hsi  
14  
15  
16 Chen<sup>7</sup>, Kuang-Yi Chang<sup>1,3\*</sup>

17  
18  
19 <sup>1</sup> Department of Anesthesiology, Taipei Veterans General Hospital, Taipei, Taiwan

20  
21 <sup>2</sup> Department of Anesthesiology, Shuang Ho Hospital, Taipei Medical University, New Taipei  
22  
23 City, Taiwan

24  
25 <sup>3</sup> School of Medicine, National Yang-Ming University, Taipei, Taiwan

26  
27  
28 <sup>4</sup> Department of Anesthesiology, School of Medicine, College of Medicine, Taipei Medical  
29  
30 University, Taipei, Taiwan.

31  
32 <sup>5</sup> Department of Surgery, Taipei Veterans General Hospital, Yuli Branch, Hualien, Taiwan

33  
34  
35 <sup>6</sup> Department of Technology Application and Human Resource Development, National  
36  
37 Taiwan Normal University, Taipei, Taiwan

38  
39  
40  
41 <sup>7</sup> Division of Biostatistics, Graduate Institute of Epidemiology and Preventive Medicine,  
42  
43 College of Public Health, National Taiwan University, Taipei, Taiwan

44  
45  
46  
47  
48  
49  
50 \* Corresponding author

51  
52  
53 **Word count:** Text (2684).

54  
55 **Correspondence to**

56  
57 Dr. Chang: [kychang@vghtpe.gov.tw](mailto:kychang@vghtpe.gov.tw)

58  
59 Department of Anesthesiology, Taipei Veterans General Hospital, No. 201, Sec. 2, Shih-pai  
60 Rd., Taipei 11217, Taiwan. Tel: +886-2-28757549; Fax: +886-2-28751597

## Abstract

**Objectives:** Previous studies showed reductions in recurrence and mortality rate of several cancer types in patients receiving perioperative epidural analgesia. This study aimed to investigate the effects of thoracic epidural analgesia on oncologic outcomes after resection for lung cancer.

**Design:** Retrospective study using propensity score matching methodology.

**Setting:** Single medical centre in Taiwan.

**Participants:** Patients with stage I-III non-small-cell lung cancer undergoing primary tumour resection between January 2005 and December 2015 and had either epidural analgesia, placed preoperatively and used intra- and postoperatively, or intravenous analgesia were evaluated through May 2017.

**Primary and secondary outcome measures:** Primary endpoint was postoperative recurrence-free survival and secondary endpoint was overall survival.

**Results:** The 3-yr recurrence-free and overall survival rates were 69.8% (95% CI: 67.4 – 72.2%) and 92.4% (95% CI: 91 – 93.8%) in the epidural group and 67.4% (95% CI: 62.3 – 72.5%) and 89.6% (95% CI: 86.3 – 92.9%) in the non-epidural group, respectively.

Multivariable Cox regression analysis before matching demonstrated no significant difference in recurrence or mortality between groups (adjusted hazard ratio: 0.93, 95% CI: 0.76 – 1.14 for recurrence; 0.81, 95% CI: 0.58 – 1.13 for mortality), similar to the results after matching

1  
2  
3  
4 (hazard ratio: 0.97, 95% CI: 0.71 – 1.31; 0.94, 95% CI: 0.57 – 1.54). Independent risk factors  
5  
6  
7 for both recurrence and mortality were male, higher pretreatment carcinoembryonic antigen  
8  
9  
10 level, advanced cancer stage, poor differentiation, lymphovascular invasion, microscopic  
11  
12  
13 necrosis, and postoperative radiotherapy.

14  
15  
16 **Conclusions:** Thoracic epidural analgesia was not associated with better recurrence-free or  
17  
18  
19 overall survival in patients receiving surgical resection for stage I-III non-small-cell lung  
20  
21  
22 cancer.

23  
24  
25 **Keywords:** Epidural Analgesia; Cancer; Recurrence; Mortality; Non-small-cell Lung  
26  
27  
28 Carcinoma; Propensity Score  
29  
30  
31  
32  
33  
34  
35  
36  
37  
38  
39  
40  
41  
42  
43  
44  
45  
46  
47  
48  
49  
50  
51  
52  
53  
54  
55  
56  
57  
58  
59  
60

## Article Summary

### Strengths and limitations of this study

- Large sample size and long follow-up time were employed to evaluate the impacts of epidural analgesia on long-term outcomes after lung cancer surgery.
- Propensity score matching was used to deal with possible imbalances in collected variables.
- Epidural assignment was not randomized, clinical care was not standardized and potential selection bias cannot be ruled out.
- Effects of unmeasured confounders on outcomes after lung cancer surgery cannot be further evaluated.

## Introduction

Lung cancer is the most commonly diagnosed malignancy worldwide, and its incidence continues to grow.<sup>1</sup> An estimated 1.8 million new cases of lung cancer were diagnosed and 1.59 million lung cancer deaths occurred globally in 2012.<sup>1</sup> Surgical removal of the primary tumour is the mainstay of treatment for patients with non-small-cell lung cancer staged I through IIIA.<sup>2</sup> However, surgical dissection and manipulation are associated with unintentional dispersal of cancer cells into the blood and lymphatic systems.<sup>3</sup> Whether the residual neoplastic cell would develop into a metastasis depends on the perioperative immune competence of the patient. Surgically induced stress hormone, as well as inhaled volatile anesthetics and systemic opioids, can diminish natural killer cell function, the primary defense against cancer cells.<sup>4</sup>

Opioids inhibit components of both cell-mediated and humoral immunity.<sup>5</sup> Morphine also has proangiogenic properties that may promote dissemination of angiogenesis-dependent tumours.<sup>6</sup> Inflammatory cytokines have been shown to regulate the expression of the mu-opioid receptor (MOR) gene, highlighting an interaction between the opioid and immune systems.<sup>7</sup> It is noted that the MOR is over-expressed in several types of lung cancer and it promotes opioid- and growth factor-induced proliferation and migration in human lung cancer cells.<sup>8</sup> Furthermore, silencing the MOR greatly reduced opioid-induced tumour growth and metastasis in vitro.<sup>9</sup>

1  
2  
3  
4 Thoracic epidural analgesia has commonly been used for the management of postoperative  
5  
6  
7 pain after thoracic surgeries. Epidural analgesia may be beneficial through its opioid and  
8  
9  
10 general anesthetic sparing and surgical stress alleviating properties. For major thoracic  
11  
12  
13 surgeries, epidural analgesia reduced mortality, respiratory complications and opioid  
14  
15  
16 consumption and improved time to ambulation.<sup>10</sup> However, the effect of epidural analgesia on  
17  
18  
19 oncologic outcomes after lung cancer resection remains unclear, and only one retrospective  
20  
21  
22 study with limited sample size is available for this issue.<sup>11</sup> Therefore, we conducted this  
23  
24  
25 retrospective cohort study to investigate the relationship between perioperative thoracic  
26  
27  
28 epidural analgesia and cancer recurrence or overall survival in patients following surgical  
29  
30  
31 resection for non-small-cell lung cancer. The effects of other major prognostic factors were  
32  
33  
34 assessed as well to determine the significant predictors of oncologic outcomes after lung  
35  
36  
37 cancer resection.  
38  
39  
40  
41  
42  
43  
44  
45  
46  
47  
48  
49  
50  
51  
52  
53  
54  
55  
56  
57  
58  
59  
60



## Methods

### *Setting and patient selection*

The study was approved by the Institutional Review Board of Taipei Veterans General Hospital, Taipei, Taiwan (IRB-TPEVGH No. 2015-11-010CC) and written informed consent was waived. Patients undergoing surgical resection of pulmonary neoplasms between January 2005 and December 2015 at our hospital were retrospectively identified from the institutional electronic medical database. Patients with secondary lung cancer, small cell lung cancer, stage IV disease determined at the time of surgery, or missing data about demographics, pathologic details or postoperative analgesic were excluded from the study. (Figure 1) Patients were analysed in two groups: those receiving general anaesthesia with perioperative epidural analgesia and their counterparts receiving general anaesthesia without epidural analgesia.

### *Analgesia management*

All patients undergoing open thoracotomy or video-assisted thoracoscopic surgery at our hospital were offered the choice of epidurals with preoperative catheter placement or intravenous analgesia with a demand pump. If epidural analgesia was selected, an epidural catheter was typically placed at a middle thoracic region (e.g., T6–T8) and assessed its function with a test dose of local anesthetic preoperatively. Epidural analgesia was started intraoperatively with local anesthetic (bupivacaine 0.25% or 0.5%) and continued postoperatively for 48 to 72 hours. Typically, patients undergoing lung cancer surgery

1  
2  
3  
4 received fentanyl 50 to 150 µg for anesthetic induction. Patients with effective epidurals were  
5  
6  
7 rarely given additional opioids perioperatively. If patients refused epidurals or it was  
8  
9  
10 contraindicated, an intravenous patient-controlled analgesia was administered via an  
11  
12 ambulatory infusion pump (Gemstar™ Yellow, Hospira, IL, USA) programmed to deliver  
13  
14 morphine at a demand dose of 1 mg with a lockout time of 6 minutes.  
15  
16  
17

### 18 19 *Data retrieval*

20  
21  
22 An electronic medical database was used to determine the baseline clinicopathologic risk  
23  
24 factors for cancer recurrence and mortality. The following data were obtained from medical  
25  
26 records: demographic characteristics; the Eastern Cooperative Oncology Group (ECOG)  
27  
28 performance score;<sup>12</sup> co-existing diseases (chronic obstructive pulmonary disease, diabetes,  
29  
30 chronic kidney disease, etc); preoperative pulmonary function (forced vital capacity and  
31  
32 forced expiratory volume in one second); pretreatment carcinoembryonic antigen (CEA)  
33  
34 level;<sup>13</sup> anaesthesia time, perioperative packed red blood cell (pRBC) transfusion;<sup>14</sup>  
35  
36 pathologic features (tumour differentiation, microscopic necrosis,<sup>15</sup> lymphovascular  
37  
38 invasion,<sup>16</sup> and perineural invasion);<sup>17</sup> whether preoperative or postoperative adjuvant  
39  
40 chemotherapy or radiotherapy was used; and each patient's current status as determined by  
41  
42 documentation of follow-up visits to the hospital's outpatient clinic or subsequent admissions.  
43  
44  
45 Tumour nodes metastasis (TNM) staging was also obtained from the record and translated  
46  
47 into stage I to III according to the American Joint Committee on Cancer criteria (AJCC-7  
48  
49  
50  
51  
52  
53  
54  
55  
56  
57  
58  
59  
60

1  
2  
3  
4 staging system).<sup>18</sup> Adjuvant therapies given in the form of chemotherapy  
5  
6 (cisplatin-gemcitabine, cisplatin-paclitaxel, cisplatin-docetaxel, or carboplatin-paclitaxel) or  
7  
8 radiotherapy were at the discretion of surgeons and patients, and was defined as any therapy  
9  
10 given within 90 days of surgery. The radiologists and thoracic surgeons of our hospital  
11  
12 determined whether cancer recurred or not, which was mainly based on imaging studies  
13  
14 (computed tomography, magnetic resonance imaging, bone scan, etc.) and defined by  
15  
16 response evaluation criteria in solid tumours (RECIST) guidelines.<sup>19</sup> Pathology-proven  
17  
18 second primary lung cancer was not considered as a recurrent disease. At our hospital, close  
19  
20 surveillance was performed for survivors of lung cancer following definitive surgical therapy,  
21  
22 including chest computed tomography every 6 months for at least the first 2 years, and  
23  
24 annually thereafter. The follow-up rates of this cohort were 95.3%, 88.7%, and 78.8% in the  
25  
26 end of the postoperative first, third, and fifth year, respectively. (Table S1) The date of death  
27  
28 was determined based on medical records or death certificate.  
29  
30  
31  
32  
33  
34  
35  
36  
37  
38  
39  
40  
41  
42

43 Medical records of all the patients included were extracted by specialist anesthesiologists who  
44  
45 were not involved in data analysis. The quality of the extracted data was verified through  
46  
47 random sampling by the authors. Data were collected up to the end of May 2017.  
48  
49  
50  
51

52 The primary endpoint was recurrence-free survival, which was defined as time from the date  
53  
54 of surgery to the date of cancer recurrence. The secondary endpoint was overall survival,  
55  
56 defined as time from the date of surgery to the date of death. For those without the event of  
57  
58  
59  
60

1  
2  
3  
4 cancer recurrence or death, their survival times were regarded as the corresponding censored  
5  
6  
7 observations with the last visit date used as the censored date.  
8  
9

### 10 ***Statistical analysis***

11  
12  
13 The comparisons of patient characteristics between the epidural and non-epidural groups were  
14  
15  
16 performed using chi-square tests for categorical variables and either t tests or Wilcoxon rank  
17  
18  
19 sum tests for continuous variables, as appropriate. The Kaplan-Meier method and log rank  
20  
21  
22 test were used to compare recurrence-free and overall survival distributions between the two  
23  
24  
25 groups. Univariate Cox regression analysis was used to evaluate the effects of epidural  
26  
27  
28 analgesia and other variables collected in the study on recurrence-free or overall survival.  
29  
30  
31 Significant predictors of recurrence-free or overall survival in the univariate analysis were  
32  
33  
34 used as candidates for stepwise model selection processes in the following multivariable  
35  
36  
37 analysis. The entry and exit criteria of significance level were set at 0.05 and 0.1, respectively,  
38  
39  
40 to select factors associated with recurrence-free and overall survival in the multivariable  
41  
42  
43 analysis. Afterward the effects of epidural analgesia adjusted for the selected predictors in the  
44  
45  
46 multivariable analysis on recurrence-free and overall survival were further evaluated.  
47  
48

49 To account for the potential imbalance in measured confounders related to cancer recurrence  
50  
51  
52 or survival of lung cancer between epidural and non-epidural groups, propensity scores based  
53  
54  
55 on a collection of patient characteristics was developed to estimate the probability of  
56  
57  
58 receiving epidurals (Table S2). Propensity score matching was performed as the primary  
59  
60

1  
2  
3  
4 analysis using a caliper with width equal to 0.2 of the standard deviation of the logit of the  
5  
6  
7 propensity score to ensure sufficient balance in collected variables between matching pairs.<sup>20</sup>  
8  
9

10 For sensitivity analysis, all subjects were divided into five equal-size groups using the  
11  
12  
13 quintiles of the estimated propensity score and stratified Cox regression analysis was  
14  
15  
16 conducted to obtain a pooled hazard ratio across the five strata to ensure the consistency  
17  
18  
19 among different estimates of the effects of epidurals on cancer recurrence or overall survival.

20  
21  
22 The significance level of all hypotheses was 0.05 for a two-sided test. IBM SPSS Statistics for  
23  
24  
25 Windows Version 22.0 (Armonk, NY: IBM Corp.) was used for all analyses.  
26  
27  
28  
29  
30  
31  
32  
33  
34  
35  
36  
37  
38  
39  
40  
41  
42  
43  
44  
45  
46  
47  
48  
49  
50  
51  
52  
53  
54  
55  
56  
57  
58  
59  
60

## Results

Total of 2191 patients were included in this study and 1799 (82.1%) of them received epidural analgesia. There were some differences in the distributions of baseline characteristics between groups, including larger forced expiratory volume in one second ( $p = 0.031$ ) and less thoracoscopic surgery ( $p < 0.001$ ) in epidural group. (Table 1) The rate of epidural replacement declined because more resections of lung cancer were done with thoracoscopic technique at our hospital in recent years. (Table S3) Those not receiving epidurals, as mentioned above, had intravenous patient-controlled opioid analgesia. The follow-up time was longer in epidural group, 43.5 months (interquartile range 25.3 – 72.4) versus 39.4 (21.9 – 59.9) in non-epidural group, respectively ( $p < 0.001$ ). Table 2 shows the details of cancer stages and pathologic features of the two groups. The epidural group had higher rate of lymphocytic infiltration. After propensity score matching, the final sample of 372 matched pairs of patients was analysed, and no significant difference was found in demographic or pathologic characteristics between groups. (Table 1)

### *Association between Thoracic Epidural Analgesia and Recurrence-free Survival*

The 3-yr and 5-yr recurrence-free survival were 69.8% (95% CI: 67.4 – 72.2%) and 64.4% (95% CI: 61.9 – 66.9%) in the epidural group and 67.4% (95% CI: 62.3 – 72.5%) and 62.8% (95% CI: 57.1 – 68.5%) in the non-epidural group, respectively. No significant difference in the distribution of recurrence-free survival after lung cancer surgery was noted when

1  
2  
3  
4 comparing epidural with non-epidural group ( $p = 0.54$  by log rank test, Figure 2A). Moreover,  
5  
6  
7 epidural analgesia was not associated with better recurrence-free survival in patients stratified  
8  
9  
10 by cancer stages (Figure. 2B).

11  
12  
13 The multivariable regression model indicated eight independent prognostic factors, including  
14  
15  
16 male (HR: 1.30), pretreatment CEA level (HR: 1.26, on base-10 logarithmic scale), cancer  
17  
18  
19 stage (II vs. I, HR: 1.93; III vs. I, HR: 2.85), tumour differentiation (moderate vs. good, HR:  
20  
21  
22 3.75; poor vs. good, HR: 5.20), microscopic tumour necrosis (HR: 1.44), pathologic  
23  
24  
25 lymphovascular invasion (HR: 2.05), and postoperative chemotherapy (HR: 1.46) and  
26  
27  
28 radiotherapy (HR: 1.44). (Table 3) Adjusting for other covariates, the effect of epidurals on  
29  
30  
31 recurrence-free survival after lung cancer surgery was non-significant (HR: 0.93, 95% CI:  
32  
33  
34 0.76 – 1.14,  $p = 0.47$ ) in the multivariable analysis, similar to the results after  
35  
36  
37 propensity-score matching (hazard ratio: 0.97, 95% CI: 0.71 – 1.3,  $p = 0.82$ ) and the  
38  
39  
40 quintile-stratified analysis (pooled HR: 0.94, 95% CI: 0.76 – 1.15,  $p = 0.53$ ).

#### 41 42 43 *Association between Thoracic Epidural Analgesia and Overall Survival*

44  
45  
46 The 3-yr and 5-yr overall survival were 92.4% (95% CI: 91 – 93.8%) and 85.8% (95% CI:  
47  
48  
49 83.8 – 87.8%) in the epidural group and 89.6% (95% CI: 86.3 – 92.9%) and 84.3% (95% CI:  
50  
51  
52 80 – 88.6%) in the non-epidural group.

53  
54  
55 No significant difference in the distribution of long-term mortality after lung cancer surgery  
56  
57  
58 was found between the epidural and non-epidural groups (Figure 2C,  $p = 0.13$  by log rank  
59  
60

1  
2  
3  
4 test). In addition, no significant difference in overall survival was noted between the two  
5  
6  
7 groups in the subgroup analysis for distinct cancer stages (Figure 2D).  
8  
9

10 Nine independent prognostic factors were identified after the multivariable analysis (Table 3),  
11  
12 including male (HR: 1.97), ECOG performance score  $\geq 1$  (HR: 1.49), pretreatment CEA level  
13  
14 (HR: 1.67), cancer stage (II vs. I HR: 2.06; III vs. I, HR: 2.96), perioperative pRBC  
15  
16 transfusion (HR: 1.40), tumour differentiation (moderate vs. good, HR: 4.72; poor vs. good,  
17  
18 HR: 6.17), microscopic necrosis (HR: 1.38), pathologic lymphovascular invasion (HR: 2.13),  
19  
20 and postoperative radiotherapy (HR: 1.81). Multivariable analysis indicated no association  
21  
22 between epidural analgesia and mortality in non-small-cell lung cancer after surgery (HR:  
23  
24 0.81, 95% CI: 0.58 – 1.13,  $p = 0.21$ ). Propensity score matching generated similar results to  
25  
26 the multivariable regression analysis (HR: 0.94, 95% CI: 0.57 – 1.54,  $p = 0.8$ ) as well as the  
27  
28 quintile-stratified (HR: 0.8, 95% CI: 0.58 – 1.1,  $p = 0.17$ ) propensity score analyses.  
29  
30  
31  
32  
33  
34  
35  
36  
37  
38  
39  
40  
41  
42  
43  
44  
45  
46  
47  
48  
49  
50  
51  
52  
53  
54  
55  
56  
57  
58  
59  
60



## Discussion

To our knowledge, this is the largest retrospective study applying propensity scoring methods to evaluate the impacts of epidural analgesia on oncologic outcomes after lung cancer surgery.

We found no evidence that epidural analgesia was associated with improved recurrence-free survival or overall survival in patients following surgical resection of non-small-cell lung cancer. Major clinicopathologic prognostic factors were also taken into account in this study to estimate the adjusted effects of epidurals and avoid potential confounding effects from unbalanced distributions of important risk factors between the epidural group and its counterpart. From the perspective of methodology, we used propensity score matching to cancel out the potential imbalances in baseline characteristics and obtained similar results with those from traditional multivariable model. The combination of both analytical methods provided more persuasive proof than either of them did. Our study provided valuable information to reject the hypothesis of beneficial effect of epidurals on cancer recurrence or long-term survival after surgical resection of non-small-cell lung cancer with large sample size and considerable prognostic factors which were lacked in the previous survey.<sup>11</sup>

Perioperative immune function is an important determinant for metastases after cancer resection surgery. Anesthetic management of cancer patients could impact long-term outcome, and potentially beneficial interventions include minimizing the use of volatile anesthetics and blood transfusion, administration of cyclooxygenase antagonists and statin, and hypothermia

1  
2  
3  
4 therapy.<sup>21</sup> However, whether regional analgesia reduces cancer recurrence after resection  
5  
6  
7 surgery remains inconclusive. The Cochrane review included four post-hoc analyses of  
8  
9  
10 previous controlled trials and indicated that current evidence for the benefit of regional  
11  
12  
13 anaesthesia on cancer outcome is inadequate due to limitations of study design and  
14  
15  
16 incomplete consideration of confounders.<sup>22</sup>

17  
18  
19 Although Cata and colleagues reported null results of epidural analgesia on recurrence-free  
20  
21  
22 and overall survival after lung cancer surgery,<sup>11</sup> they found an association between the  
23  
24  
25 intraoperative opioid consumption and recurrence-free survival or overall survival later only  
26  
27  
28 for stage I disease.<sup>23</sup> Our results did not support beneficial effects of epidural analgesia on  
29  
30  
31 oncologic outcomes in patients stratified by cancer stages. This may be attributed to the  
32  
33  
34 difference in distributions of patient attributes or treatment modality. Maher and co-workers  
35  
36  
37 reported an association between increased opioid doses during initial 96-hours postoperative  
38  
39  
40 period and higher recurrence rate of non-small-cell lung cancer within 5 years.<sup>24</sup> However,  
41  
42  
43 they found no difference in intraoperative opioid administration among those with or without  
44  
45  
46 recurrence of lung cancer at the 5 year follow-up. The effects of regional block and opioid  
47  
48  
49 doses on long-term cancer outcomes in early-stage lung cancer await further investigation.

50  
51  
52 Our results showed perioperative blood transfusion is a risk factor for all-cause mortality, in  
53  
54  
55 line with previous literature.<sup>14</sup> In addition to mortality, allogenic blood transfusion may be  
56  
57  
58 associated with increased risk of cancer recurrence.<sup>25</sup> Transfused leucocytes can lead to  
59  
60

1  
2  
3  
4 immunomodulation, including changes in circulating lymphocytes, helper T-cell, suppressor  
5  
6  
7 T-cell ratios, and B-cell function.<sup>25</sup> The meta-analysis by Churchhouse and colleagues  
8  
9  
10 examined the effect of blood transfusion on cancer recurrence and overall survival in patients  
11  
12  
13 undergoing surgical resection of lung cancer in 5378 patients. Though no definitive  
14  
15  
16 conclusions could be drawn, there appeared to be a relationship between transfusion and  
17  
18  
19 reduction of disease-free survival.<sup>26</sup> In our analysis, the association between blood transfusion  
20  
21  
22 and recurrence was non-significant after adjustment for covariates. This finding may imply  
23  
24  
25 that the potential impacts of other important confounders (e.g., disease severity, presence of  
26  
27  
28 postoperative complications) may have a greater bearing on prognosis than the reception of  
29  
30  
31 blood itself.

32  
33  
34 Several limitations are inherent in this retrospective observational study. First, patients were  
35  
36  
37 not randomized and clinical care was not standardized, so that potential selection bias and  
38  
39  
40 effects from unmeasured confounders cannot be excluded. Second, relatively small  
41  
42  
43 percentage (17.9%) of the patients was cared for without epidural analgesia. Third, the rate of  
44  
45  
46 epidural replacement was lower in the latter years and this may result in longer follow-up  
47  
48  
49 period of epidural group. However, these imbalances have been cancelled out after propensity  
50  
51  
52 score matching. Fourth, it is difficult to determine the total narcotic consumptions for each  
53  
54  
55 patient due to the incompleteness of our electronic medical records.

56  
57  
58 In conclusion, our study rejected the association between epidural analgesia and cancer  
59  
60

1  
2  
3  
4 recurrence or long-term mortality in patients after surgery for stage I through III  
5  
6  
7 non-small-cell lung cancer. Prospective randomized trials are warranted to confirm or refute  
8  
9  
10 causal relationships between epidural analgesia and the long-term outcomes after lung cancer  
11  
12  
13 surgery.  
14  
15  
16  
17  
18  
19  
20  
21  
22  
23  
24  
25  
26  
27  
28  
29  
30  
31  
32  
33  
34  
35  
36  
37  
38  
39  
40  
41  
42  
43  
44  
45  
46  
47  
48  
49  
50  
51  
52  
53  
54  
55  
56  
57  
58  
59  
60

For peer review only

## Footnotes

**Author contributors:** The author contributions were as follows: HLW and YHT contributed to data acquisition and manuscript drafting. MYT helped revise the manuscript. HHC contributed to study design and statistical analysis. KYC contributed to statistical review, manuscript revision, and final approval of the version to be published. All authors read and approved the final manuscript.

**Funding:** This work was supported by the grants from Taipei Veterans General Hospital, Taipei, Taiwan (V105C-050) and Ministry of Science and Technology, Taipei, Taiwan (MOST 104-2314-B-075-015).

**Competing interests:** None declared.

**Patient consent:** Not required.

**Ethics approval:** The study was approved by the Institutional Review Board of Taipei Veterans General Hospital, Taipei, Taiwan.

**Provenance and peer review:** Not commissioned; externally peer reviewed.

**Data sharing statement:** No additional data are available.

## References

1. World Health Organization. International agency for research on cancer GLOBOCAN 2012: estimated cancer incidence, mortality and prevalence worldwide in 2012. In:2012.
2. Molina JR, Yang P, Cassivi SD, Schild SE, Adjei AA. Non-small cell lung cancer: epidemiology, risk factors, treatment, and survivorship. *Mayo Clin Proc.* 2008;83:584-94.
3. Lloyd JM, McIver CM, Stephenson SA, et al. Identification of early-stage colorectal cancer patients at risk of relapse post-resection by immunobead reverse transcription-PCR analysis of peritoneal lavage fluid for malignant cells. *Clin Cancer Res.* 2006;12:417-23.
4. Gupta K, Kshirsagar S, Chang L, et al. Morphine stimulates angiogenesis by activating proangiogenic and survival-promoting signaling and promotes breast tumor growth. *Cancer Res.* 2002;62:4491-8.
5. Gach K, Wyrębska A, Fichna J, Janecka A. The role of morphine in regulation of cancer cell growth. *Naunyn Schmiedebergs Arch Pharmacol.* 2011;384:221-30.
6. Colvin LA, Fallon MT, Buggy DJ. Cancer biology, analgesics, and anaesthetics: is there a link? *Br J Anaesth.* 2012;109:140-3.
7. Yeager MP, Colacchio TA, Yu CT, et al. Morphine inhibits spontaneous and

- 1  
2  
3  
4 cytokine-enhanced natural killer cell cytotoxicity in volunteers. *Anesthesiology*.  
5  
6  
7 1995;83:500-8.  
8  
9
- 10 8. Lennon FE, Mirzapioiazova T, Mambetsariev B, et al. The Mu opioid receptor  
11 promotes opioid and growth factor-induced proliferation, migration and Epithelial  
12 Mesenchymal Transition (EMT) in human lung cancer. *PLoS One*. 2014;9:e91577.  
13  
14  
15
- 16 9. Mathew B, Lennon FE, Siegler JH, et al. Novel role of the Mu Opioid receptor in lung  
17 cancer progression: a laboratory study. *Anesth Analg*. 2011;112:558-67.  
18  
19  
20  
21  
22  
23
- 24 10. Pöpping DM, Elia N, Marret E, Remy C, Tramèr MR. Protective effects of epidural  
25 analgesia on pulmonary complications after abdominal and thoracic surgery: a  
26 meta-analysis. *Arch Surg*. 2008;143:990-9.  
27  
28  
29  
30  
31  
32
- 33 11. Cata JP, Gottumukkala V, Thakar D, et al. Effects of postoperative epidural analgesia  
34 on recurrence-free and overall survival in patients with nonsmall cell lung cancer. *J*  
35 *Clin Anesth*. 2014;26:3-17.  
36  
37  
38  
39  
40  
41
- 42 12. Hoang T, Xu R, Schiller JH, Bonomi P, Johnson DH. Clinical model to predict  
43 survival in chemo-naïve patients with advanced non-small-cell lung cancer treated  
44 with third-generation chemotherapy regimens based on eastern cooperative oncology  
45 group data. *J Clin Oncol*. 2005;23:175-83.  
46  
47  
48  
49  
50  
51
- 52 13. Grunnet M, Sorensen JB. Carcinoembryonic antigen (CEA) as tumor marker in lung  
53 cancer. *Lung Cancer*. 2012;76:138-43.  
54  
55  
56  
57  
58  
59  
60

- 1  
2  
3  
4 14. Glance LG, Dick AW, Mukamel DB, et al. Association between intraoperative blood  
5  
6  
7 transfusion and mortality and morbidity in patients undergoing noncardiac surgery.  
8  
9  
10 *Anesthesiology*. 2011;114:283-92.  
11
- 12  
13 15. Park SY, Lee HS, Jang HJ, et al. Tumor necrosis as a prognostic factor for stage IA  
14  
15  
16 non-small cell lung cancer. *Ann Thorac Surg*. 2011;91:1668-73.  
17
- 18  
19 16. Higgins KA, Chino JP, Ready N, et al. Lymphovascular invasion in non-small-cell  
20  
21  
22 lung cancer: implications for staging and adjuvant therapy. *J Thorac Oncol*.  
23  
24  
25 2012;7:1141-7.  
26
- 27  
28 17. Yilmaz A, Duyar SS, Cakir E, et al. Clinical impact of visceral pleural,  
29  
30  
31 lymphovascular and perineural invasion in completely resected non-small cell lung  
32  
33  
34 cancer. *Eur J Cardiothorac Surg*. 2011;40:664-70.  
35
- 36  
37 18. Edge SB, Byrd SR, Compton CC, et al. *AJCC Cancer Staging Manual*. 7th ed. New  
38  
39  
40 York, NY: Springer-Verlag, 2010.  
41
- 42  
43 19. Eisenhauer EA, Therasse P, Bogaerts J, et al. New response evaluation criteria in solid  
44  
45  
46 tumours: revised RECIST guideline (version 1.1). *Eur J Cancer*. 2009;45:228-47.  
47
- 48  
49 20. Austin PC. An introduction to propensity score methods for reducing the effects of  
50  
51  
52 confounding in observational studies. *Multivariate Behav Res*. 2011;46:399-424.  
53
- 54  
55 21. Heaney Á, Buggy DJ. Can anaesthetic and analgesic techniques affect cancer  
56  
57  
58 recurrence or metastasis? *Br J Anaesth*. 2012;109:i17-i28.  
59  
60



- 1  
2  
3  
4 22. Cakmakkaya OS, Kolodzie K, Apfel CC, Pace NL. Anaesthetic techniques for risk of  
5 malignant tumour recurrence. *Cochrane Database Syst Rev*. 2014:CD008877.  
6  
7  
8  
9  
10 23. Cata JP, Keerty V, Keerty D, et al. A retrospective analysis of the effect of  
11 intraoperative opioid dose on cancer recurrence after non-small cell lung cancer  
12 resection. *Cancer Med*. 2014;3:900-8.  
13  
14  
15  
16  
17  
18 24. Maher DP, Wong W, White PF, et al. Association of increased postoperative opioid  
19 administration with non-small-cell lung cancer recurrence: a retrospective analysis. *Br*  
20 *J Anaesth*. 2014;113:i88-i94.  
21  
22  
23  
24  
25  
26  
27 25. Weber RS, Jabbour N, Martin RCG. Anemia and transfusions in patients undergoing  
28 surgery for cancer. *Ann Surg Oncol*. 2008;15:34-45.  
29  
30  
31  
32  
33  
34 26. Churchhouse AMD, Mathews TJ, McBride OMB, Dunning J. Does blood transfusion  
35 increase the chance of recurrence in patients undergoing surgery for lung cancer?  
36  
37  
38  
39  
40 *Interact Cardiovasc Thorac Surg*. 2012;14:85-90.  
41  
42  
43  
44  
45  
46  
47  
48  
49  
50  
51  
52  
53  
54  
55  
56  
57  
58  
59  
60

## Tables

Table 1: Patient demographics

|                                            | Before matching    |                    |      | After matching     |                    |      |
|--------------------------------------------|--------------------|--------------------|------|--------------------|--------------------|------|
|                                            | EA (n=1799)        | Non-EA (n=392)     | SD   | EA (n=372)         | Non-EA (n=372)     | SD   |
| <b>Age, year</b>                           | 64 ± 11            | 64 ± 11            | 0.1  | 64 ± 12            | 64 ± 11            | 5.8  |
| <b>Sex, male</b>                           | 918 (51.0%)        | 194 (49.5%)        | 3.1  | 192 (51.6%)        | 183 (49.2%)        | 4.8  |
| <b>ASA physical status ≥ 3</b>             | 424 (23.6%)        | 109 (27.8%)        | 9.7  | 104 (28.0%)        | 100 (26.9%)        | 2.4  |
| <b>ECOG PS ≥ 1</b>                         | 549 (30.5%)        | 130 (33.2%)        | 5.7  | 132 (35.5%)        | 117 (31.5%)        | 8.6  |
| <b>Comorbidities</b>                       |                    |                    |      |                    |                    |      |
| COPD                                       | 474 (26.3%)        | 107 (27.3%)        | 2.1  | 102 (27.4%)        | 100 (26.9%)        | 1.2  |
| Diabetes                                   | 297 (16.5%)        | 56 (14.3%)         | 6.2  | 56 (15.1%)         | 52 (14.0%)         | 3.1  |
| Coronary artery disease                    | 171 (9.5%)         | 41 (10.5%)         | 3.2  | 41 (11.0%)         | 39 (10.5%)         | 1.7  |
| Heart failure                              | 74 (4.1%)          | 21 (5.4%)          | 5.9  | 15 (4.0%)          | 19 (5.1%)          | 5.2  |
| Stroke                                     | 60 (3.3%)          | 18 (4.6%)          | 6.4  | 25 (6.7%)          | 17 (4.6%)          | 9.3  |
| Chronic kidney disease                     | 141 (7.8%)         | 35 (8.9%)          | 3.9  | 25 (6.7%)          | 31 (8.3%)          | 6.1  |
| <b>Pulmonary function test</b>             |                    |                    |      |                    |                    |      |
| FVC, liter                                 | 2.88 ± 0.76        | 2.81 ± 0.73        | 9.5  | 2.83 ± 0.76        | 2.82 ± 0.73        | 1.9  |
| FEV1, liter                                | 2.22 ± 0.62        | 2.15 ± 0.60        | 12.3 | 2.17 ± 0.62        | 2.16 ± 0.59        | 2.8  |
| <b>Pretreatment CEA, µg·L<sup>-1</sup></b> | 2.4 (1.8 – 3.7)    | 2.6 (1.7 – 4.2)    | 8.5  | 2.5 (1.7 – 4.0)    | 2.6 (1.7 – 4.2)    | 2.0  |
| <b>Surgeon experience</b>                  |                    |                    | 1.2  |                    |                    | 0.6  |
| Specialist < 20 years                      | 701 (39.0%)        | 155 (39.5%)        |      | 141 (37.9%)        | 142 (38.2%)        |      |
| Specialist ≥ 20 years                      | 1098 (61.0%)       | 237 (60.5%)        |      | 231 (62.1%)        | 230 (61.8%)        |      |
| <b>Thorascopic surgery</b>                 | 1199 (66.6%)       | 322 (82.1%)        | 36.1 | 292 (78.5%)        | 305 (82.0%)        | 8.8  |
| <b>Anesthesiologist experience</b>         |                    |                    | 3.9  |                    |                    | 10.8 |
| Specialist < 15 years                      | 810 (45.0%)        | 169 (43.1%)        |      | 183 (49.2%)        | 163 (43.8%)        |      |
| Specialist ≥ 15 years                      | 989 (55.0%)        | 223 (56.9%)        |      | 189 (50.8%)        | 209 (56.2%)        |      |
| <b>Anaesthesia time, min</b>               | 315 (265 – 360)    | 300 (240 – 368)    | 8.4  | 300 (240 – 360)    | 300 (240 – 360)    | 1.4  |
| <b>pRBC transfusion</b>                    | 203 (11.3%)        | 52 (13.3%)         | 6.0  | 51 (13.7%)         | 49 (13.2%)         | 1.6  |
| <b>Year of Procedure</b>                   |                    |                    | 25.7 |                    |                    | 5.7  |
| 2005 – 2009                                | 627 (34.9%)        | 69 (17.6%)         |      | 74 (19.9%)         | 67 (18.0%)         |      |
| 2010 – 2012                                | 517 (28.7%)        | 157 (40.1%)        |      | 148 (39.8%)        | 145 (39.0%)        |      |
| 2013 – 2015                                | 655 (36.4%)        | 166 (42.3%)        |      | 150 (40.3%)        | 160 (43.0%)        |      |
| <b>Preoperative C/T ± R/T</b>              | 77 (4.3%)          | 21 (5.4%)          | 5.0  | 17 (4.6%)          | 20 (5.4%)          | 3.7  |
| <b>Postoperative C/T</b>                   | 834 (46.4%)        | 163 (41.6%)        | 9.6  | 151 (40.6%)        | 158 (42.5%)        | 3.8  |
| <b>Postoperative R/T</b>                   | 98 (5.4%)          | 22 (5.6%)          | 0.7  | 26 (7.0%)          | 21 (5.6%)          | 5.5  |
| <b>Follow-up time, month</b>               | 43.5 (25.3 – 72.4) | 39.4 (21.9 – 59.9) | 20.4 | 40.3 (24.4 – 62.2) | 39.6 (21.9 – 59.8) | 8.8  |

1  
2  
3 Values were mean  $\pm$  SD, counts (percent), or median (interquartile range). Continuous variables are analysed with  
4 Wilcoxon rank-sum tests; categorical variables are analysed with Pearson chi-square tests. SD: standardized difference  
5 (imbalance is defined as absolute value greater than 20). ASA: American Society of Anesthesiologists; ECOG PS: Eastern  
6 Cooperative Oncology Group performance score; COPD: chronic obstructive pulmonary disease; FVC: forced vital  
7 capacity; FEV1: forced expiratory volume in one second; CEA: carcinoembryonic antigen; pRBC: packed red blood cell;  
8 C/T: chemotherapy; R/T: radiotherapy.  
9  
10  
11  
12  
13  
14  
15  
16  
17  
18  
19  
20  
21  
22  
23  
24  
25  
26  
27  
28  
29  
30  
31  
32  
33  
34  
35  
36  
37  
38  
39  
40  
41  
42  
43  
44  
45  
46  
47  
48  
49  
50  
51  
52  
53  
54  
55  
56  
57  
58  
59  
60

For peer review only

Table 2: Cancer stages and pathologic features

|                            | Before matching |                |      | After matching |                |     |
|----------------------------|-----------------|----------------|------|----------------|----------------|-----|
|                            | EA (n=1799)     | Non-EA (n=392) | SD   | EA (n=372)     | Non-EA (n=372) | SD  |
| <b>AJCC stage</b>          |                 |                | 2.0  |                |                | 1.8 |
| Stage I                    | 1316 (73.2%)    | 289 (73.7%)    |      | 271 (72.8%)    | 276 (74.2%)    |     |
| IA                         | 546 (30.4%)     | 116 (29.6%)    |      | 114 (30.7%)    | 110 (29.6%)    |     |
| IB                         | 770 (42.8%)     | 173 (44.1%)    |      | 157 (42.2%)    | 166 (44.6%)    |     |
| Stage II                   | 205 (11.4%)     | 52 (13.3%)     |      | 55 (14.8%)     | 48 (12.9%)     |     |
| IIA                        | 106 (5.9%)      | 26 (6.6%)      |      | 32 (8.6%)      | 24 (6.5%)      |     |
| IIB                        | 99 (5.5%)       | 26 (6.6%)      |      | 23 (6.2%)      | 24 (6.5%)      |     |
| Stage III                  | 278 (15.5%)     | 51 (13.0%)     |      | 46 (12.4%)     | 48 (12.9%)     |     |
| IIIA                       | 253 (14.1%)     | 46 (11.7%)     |      | 42 (11.3%)     | 44 (11.8%)     |     |
| IIIB                       | 25 (1.4%)       | 5 (1.3%)       |      | 4 (1.1%)       | 4 (1.1%)       |     |
| <b>Pathologic features</b> |                 |                |      |                |                |     |
| Subtype                    |                 |                | 6.8  |                |                | 5.1 |
| Adenocarcinoma             | 1511 (84.0%)    | 314 (80.1%)    |      | 292 (78.5%)    | 303 (81.5%)    |     |
| SCC                        | 200 (11.1%)     | 54 (13.8%)     |      | 54 (14.5%)     | 46 (12.4%)     |     |
| Other                      | 88 (4.9%)       | 24 (6.1%)      |      | 26 (7.0%)      | 23 (6.2%)      |     |
| Tumour differentiation     |                 |                | 5.3  |                |                | 1.8 |
| Good                       | 181 (10.1%)     | 46 (11.7%)     |      | 39 (10.5%)     | 46 (12.4%)     |     |
| Moderate                   | 1100 (61.2%)    | 215 (54.8%)    |      | 209 (56.2%)    | 201 (54.0%)    |     |
| Poor                       | 516 (28.7%)     | 131 (33.4%)    |      | 124 (33.3%)    | 125 (33.6%)    |     |
| Microscopic necrosis       | 388 (21.6%)     | 77 (19.6%)     | 4.8  | 77 (20.7%)     | 71 (19.1%)     | 4.0 |
| Lymphocytic infiltration   | 189 (10.5%)     | 27 (6.9%)      | 12.9 | 34 (9.1%)      | 27 (7.3%)      | 6.9 |
| Lymphovascular invasion    | 497 (27.6%)     | 127 (32.4%)    | 10.4 | 115 (30.9%)    | 118 (31.7%)    | 1.7 |
| Perineural infiltration    | 58 (3.2%)       | 12 (3.1%)      | 0.9  | 10 (2.7%)      | 11 (3.0%)      | 1.6 |

Values were counts (percent). Categorical variables are analysed with Pearson chi-square tests or Mann-Whitney U tests, as appropriate. SD: standardized difference (imbalance is defined as absolute value greater than 20). AJCC: American Joint Committee on Cancer; SCC: squamous cell carcinoma.

Table 3: Multivariable analysis for cancer recurrence and all-cause mortality after model selection

|                                | Cancer recurrence |                |          | All-cause mortality           |          |                |       |
|--------------------------------|-------------------|----------------|----------|-------------------------------|----------|----------------|-------|
|                                | HR                | 95% C.I.       | <i>p</i> | HR                            | 95% C.I. | <i>p</i>       |       |
| <b>EA vs. non-EA</b>           | 0.927             | 0.755 – 1.139  | 0.473    | <b>EA vs. non-EA</b>          | 0.811    | 0.582 – 1.129  | 0.214 |
| <b>Sex (M vs. F)</b>           | 1.297             | 1.026 – 1.642  | 0.030    | <b>Sex (M vs. F)</b>          | 1.969    | 1.344 – 2.882  | 0.001 |
| <b>Pretreatment CEA*</b>       | 1.263             | 1.046 – 1.524  | 0.015    | <b>ECOG PS ≥ 1</b>            | 1.494    | 1.105 – 2.019  | 0.009 |
| <b>Postoperative C/T</b>       | 1.456             | 1.187 – 1.786  | <.001    | <b>Pretreatment CEA*</b>      | 1.672    | 1.221 – 2.290  | 0.001 |
| <b>Postoperative R/T</b>       | 1.443             | 1.126 – 1.849  | 0.004    | <b>pRBC transfusion</b>       | 1.402    | 1.008 – 1.948  | 0.045 |
| <b>Stage</b>                   |                   |                | <.001    | <b>Postoperative R/T</b>      | 1.810    | 1.271 – 2.578  | 0.001 |
| II vs. I                       | 1.927             | 1.521 – 2.440  | <.001    | <b>Stage</b>                  |          |                | <.001 |
| III vs. I                      | 2.848             | 2.265 – 3.581  | <.001    | II vs. I                      | 2.059    | 1.388 – 3.054  | <.001 |
| <b>Tumour differentiation</b>  |                   |                | <.001    | III vs. I                     | 2.964    | 2.032 – 4.323  | <.001 |
| Moderate vs. good              | 3.752             | 1.919 – 7.338  | <.001    | <b>Tumour differentiation</b> |          |                | 0.014 |
| Poor vs. good                  | 5.198             | 2.632 – 10.265 | <.001    | Moderate vs. good             | 4.718    | 1.153 – 19.310 | 0.031 |
| <b>Microscopic necrosis</b>    | 1.444             | 1.203 – 1.733  | <.001    | Poor vs. good                 | 6.169    | 1.487 – 25.587 | 0.012 |
| <b>Lymphovascular invasion</b> | 2.053             | 1.717 – 2.456  | <.001    | <b>Microscopic necrosis</b>   | 1.378    | 1.037 – 1.831  | 0.027 |

HR: hazard ratio; EA: epidural analgesia; M: male, F: female; CEA: carcinoembryonic antigen; C/T: chemotherapy; R/T: radiotherapy; ECOG PS: Eastern Cooperative Oncology Group performance score; pRBC: packed red blood cell.

\* On base-10 logarithmic scale

## Figures and Legends

**Figure 1: Flow diagram for patient inclusion.**

**Figure 2: Unadjusted Kaplan–Meier curves for recurrence-free and overall survival of epidural and non- epidural groups**

No significant difference in recurrence-free survival (A and B) or overall survival (C and D) after surgery for non-small-cell lung cancer was noted when comparing epidural with non-epidural group as a whole or stratified by cancer stage.

1  
2  
3  
4  
5  
6  
7  
8  
9  
10  
11  
12  
13  
14  
15  
16  
17  
18  
19  
20  
21  
22  
23  
24  
25  
26  
27  
28  
29  
30  
31  
32  
33  
34  
35  
36  
37  
38  
39  
40  
41  
42  
43  
44  
45  
46  
47  
48  
49  
50  
51  
52  
53  
54  
55  
56  
57  
58  
59  
60

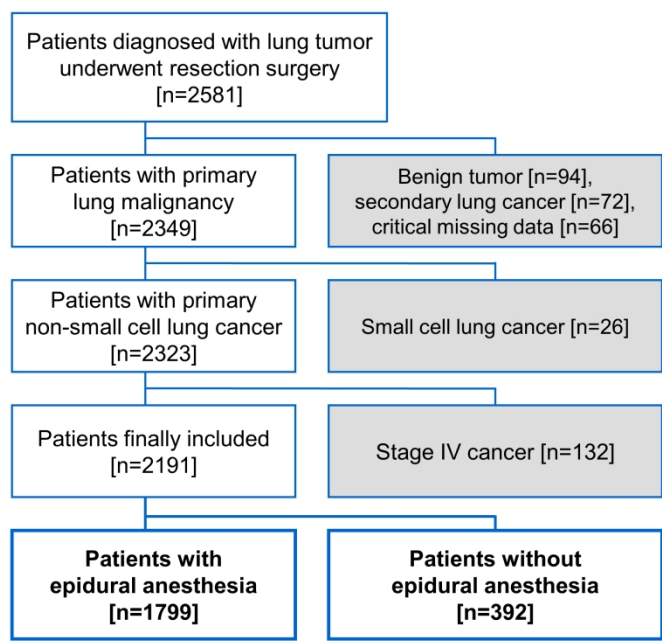

Figure 1: Flow diagram for patient inclusion.

254x190mm (300 x 300 DPI)

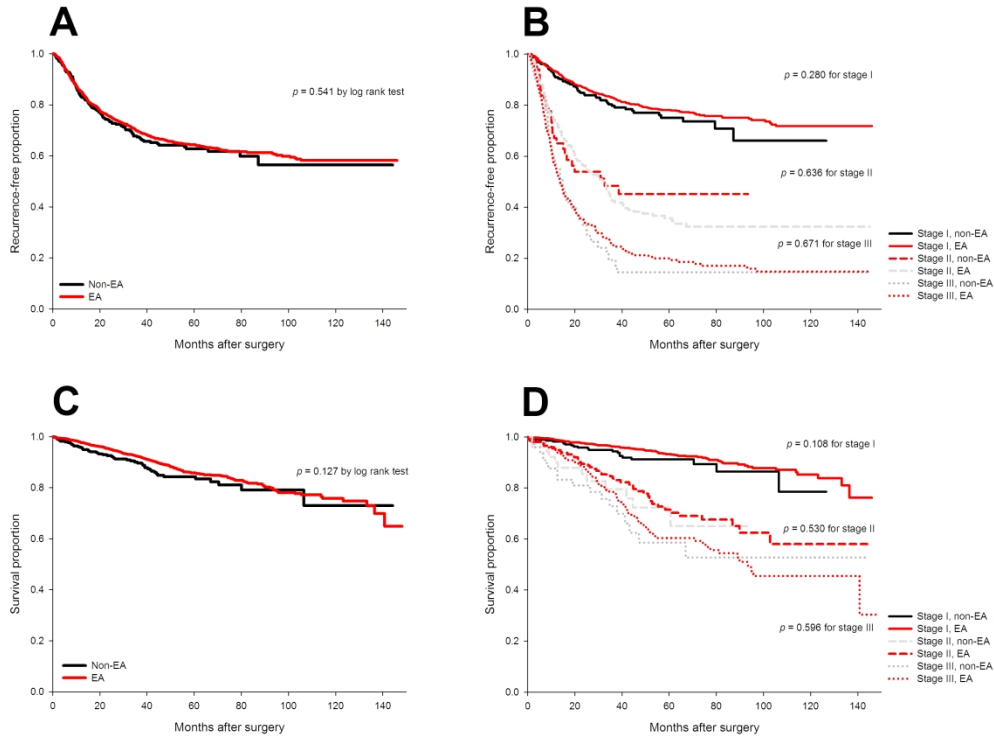

Figure 2: Unadjusted Kaplan–Meier curves for recurrence-free and overall survival of epidural and non-epidural groups

No significant difference in recurrence-free survival (A and B) or overall survival (C and D) after surgery for non-small-cell lung cancer was noted when comparing epidural with non-epidural group as a whole or stratified by cancer stage.

352x260mm (300 x 300 DPI)



**Supplement Table 1: Postoperative follow-up in this study**

| <b>Year after Surgery</b>   | <b>No. of Patients under Follow-up</b> | <b>No. of Patients Lost to Follow-up*</b> | <b>No. of Mortality</b> | <b>No. of All Patients</b> | <b>Follow-up Rate (%)**</b> |
|-----------------------------|----------------------------------------|-------------------------------------------|-------------------------|----------------------------|-----------------------------|
| <b>1<sup>st</sup> year</b>  | 2031                                   | 103                                       | 57                      | 2191                       | 95.3                        |
| <b>2<sup>nd</sup> year</b>  | 1846                                   | 239                                       | 106                     | 2191                       | 89.1                        |
| <b>3<sup>rd</sup> year</b>  | 1400                                   | 196                                       | 134                     | 1730                       | 88.7                        |
| <b>4<sup>th</sup> year</b>  | 1066                                   | 238                                       | 163                     | 1467                       | 83.8                        |
| <b>5<sup>th</sup> year</b>  | 807                                    | 262                                       | 168                     | 1237                       | 78.8                        |
| <b>6<sup>th</sup> year</b>  | 589                                    | 262                                       | 151                     | 1002                       | 73.9                        |
| <b>7<sup>th</sup> year</b>  | 399                                    | 241                                       | 139                     | 779                        | 69.1                        |
| <b>8<sup>th</sup> year</b>  | 260                                    | 187                                       | 123                     | 570                        | 67.2                        |
| <b>9<sup>th</sup> year</b>  | 192                                    | 165                                       | 105                     | 462                        | 64.3                        |
| <b>10<sup>th</sup> year</b> | 109                                    | 142                                       | 81                      | 332                        | 57.2                        |
| <b>11<sup>th</sup> year</b> | 53                                     | 101                                       | 53                      | 207                        | 51.2                        |
| <b>12<sup>th</sup> year</b> | 13                                     | 35                                        | 15                      | 63                         | 44.4                        |

\* Loss to follow-up is defined as lost contact beyond 3, 6, and 12 months in the first, second, and third year after surgery, respectively.

\*\* Follow-up rate = (number of all patients – number of patients lost to follow-up) / number of all patients

**Supplement Table 2:** The result of logistic regression analysis for propensity score matching

|                                                | <b>OR</b> | <b>95% C.I.</b> | <b><i>p</i></b> |
|------------------------------------------------|-----------|-----------------|-----------------|
| <b>Age</b>                                     | 1.015     | 1.001 – 1.029   | 0.036           |
| <b>Sex (F vs. M)</b>                           | 1.166     | 0.817 – 1.665   | 0.397           |
| <b>ASA physical status <math>\geq 3</math></b> | 0.834     | 0.618 – 1.125   | 0.235           |
| <b>ECOG PS <math>\geq 1</math></b>             | 0.823     | 0.599 – 1.130   | 0.228           |
| <b>COPD</b>                                    | 1.137     | 0.823 – 1.571   | 0.437           |
| <b>Diabetes</b>                                | 1.285     | 0.913 – 1.807   | 0.150           |
| <b>Coronary artery disease</b>                 | 0.990     | 0.653 – 1.500   | 0.961           |
| <b>Heart failure</b>                           | 0.942     | 0.539 – 1.644   | 0.832           |
| <b>Stroke</b>                                  | 0.825     | 0.462 – 1.474   | 0.515           |
| <b>Chronic kidney disease</b>                  | 1.161     | 0.744 – 1.813   | 0.510           |
| <b>FVC</b>                                     | 0.862     | 0.578 – 1.285   | 0.466           |
| <b>FEV1</b>                                    | 1.649     | 1.016 – 2.678   | 0.043           |
| <b>Pretreatment CEA *</b>                      | 0.716     | 0.513 – 0.999   | 0.049           |
| <b>Thoracoscopic surgery</b>                   | 0.591     | 0.389 – 0.898   | 0.014           |
| <b>Anaesthesia time **</b>                     | 1.282     | 0.924 – 1.778   | 0.137           |
| <b>pRBC transfusion</b>                        | 0.739     | 0.507 – 1.079   | 0.117           |
| <b>Postoperative CT</b>                        | 1.269     | 0.957 – 1.682   | 0.098           |
| <b>Postoperative RT</b>                        | 0.879     | 0.513 – 1.508   | 0.640           |
| <b>Preoperative C/T <math>\pm</math> R/T</b>   | 0.722     | 0.405 – 1.286   | 0.269           |

OR: odds ratio; F: female, M: male; ASA: American Society of Anesthesiologists; ECOG PS: Eastern Cooperative Oncology Group performance score; COPD: chronic obstructive pulmonary disease; FVC: forced vital capacity; FEV1: forced expiratory volume in one second; CEA: carcinoembryonic antigen; pRBC: packed red blood cell; C/T: chemotherapy; R/T: radiotherapy. \* On base-10 logarithmic scale; \*\* On base-2 logarithmic scale

Supplement Table 2 (continued)

|                                                                                | OR    | 95% C.I.      | <i>p</i>  |
|--------------------------------------------------------------------------------|-------|---------------|-----------|
| <b>Cancer stage I (reference)</b>                                              |       |               | 0.568     |
| Cancer stage II                                                                | 1.039 | 0.690 – 1.564 | 0.854     |
| Cancer stage III                                                               | 1.260 | 0.815 – 1.950 | 0.299     |
| <b>Well-differentiated tumour (reference)</b>                                  |       |               | 0.078     |
| Moderately-differentiated tumour                                               | 1.294 | 0.881 – 1.902 | 0.189     |
| Poorly-differentiated tumour                                                   | 0.965 | 0.622 – 1.498 | 0.875     |
| <b>Microscopic necrosis</b>                                                    | 1.247 | 0.890 – 1.749 | 0.200     |
| <b>Lymphocytic infiltration</b>                                                | 0.995 | 0.628 – 1.578 | 0.985     |
| <b>Lymphovascular invasion</b>                                                 | 0.830 | 0.612 – 1.127 | 0.233     |
| <b>Perineural invasion</b>                                                     | 1.288 | 0.639 – 2.597 | 0.480     |
| <b>Surgeon (<math>\geq 20</math> vs. <math>&lt; 20</math> years)</b>           | 1.137 | 0.887 – 1.458 | 0.312     |
| <b>Anaesthesiologist (<math>\geq 15</math> vs. <math>&lt; 15</math> years)</b> | 1.073 | 0.848 – 1.356 | 0.559     |
| <b>Year of procedure</b>                                                       |       |               | 0.001     |
| 2012 – 2010 vs. 2005 – 2009                                                    | 0.455 | 0.295 – 0.701 | $< 0.001$ |
| 2015 – 2013 vs. 2005 – 2009                                                    | 0.621 | 0.388 – 0.996 | 0.048     |

OR: odds ratio.

**Supplement Table 3:** The frequency and proportion of epidural placement and thoracoscopic surgery

| Year of Procedure | Epidural Analgesia |             | Thoracoscopic Surgery |             |
|-------------------|--------------------|-------------|-----------------------|-------------|
|                   | Counts             | Proportions | Counts                | Proportions |
| 2005              | 135 / 146          | 92.5%       | 8 / 146               | 5.5%        |
| 2006              | 130 / 139          | 93.5%       | 8 / 139               | 5.8%        |
| 2007              | 122 / 132          | 92.4%       | 9 / 132               | 6.8%        |
| 2008              | 108 / 124          | 87.1%       | 29 / 124              | 23.4%       |
| 2009              | 132 / 155          | 85.2%       | 78 / 155              | 50.3%       |
| 2010              | 166 / 221          | 75.1%       | 158 / 221             | 71.5%       |
| 2011              | 173 / 229          | 75.5%       | 210 / 229             | 91.7%       |
| 2012              | 178 / 224          | 79.5%       | 213 / 224             | 95.1%       |
| 2013              | 194 / 240          | 80.8%       | 234 / 240             | 97.5%       |
| 2014              | 236 / 297          | 79.5%       | 293 / 297             | 98.7%       |
| 2015              | 225 / 284          | 79.2%       | 281 / 284             | 98.9%       |
| <b>Overall</b>    | 1799 / 2191        | 82.1%       | 1521 / 2191           | 69.4%       |

The proportion of epidural analgesia decreased as more thoracoscopic surgeries were performed in the tumour resection of lung cancer in the period of study.

# Reporting checklist for cohort study.

Based on the STROBE cohort guidelines.

## Instructions to authors

Complete this checklist by entering the page numbers from your manuscript where readers will find each of the items listed below.

Your article may not currently address all the items on the checklist. Please modify your text to include the missing information. If you are certain that an item does not apply, please write "n/a" and provide a short explanation.

Upload your completed checklist as an extra file when you submit to a journal.

In your methods section, say that you used the STROBE cohort reporting guidelines, and cite them as:

von Elm E, Altman DG, Egger M, Pocock SJ, Gøtzsche PC, Vandenbroucke JP. The Strengthening the Reporting of Observational Studies in Epidemiology (STROBE) Statement: guidelines for reporting observational studies.

|                        |     | Reporting Item                                                                                                                  | Page Number |
|------------------------|-----|---------------------------------------------------------------------------------------------------------------------------------|-------------|
| Title                  | #1a | Indicate the study's design with a commonly used term in the title or the abstract                                              | 1           |
| Abstract               | #1b | Provide in the abstract an informative and balanced summary of what was done and what was found                                 | 2-3         |
| Background / rationale | #2  | Explain the scientific background and rationale for the investigation being reported                                            | 5-6         |
| Objectives             | #3  | State specific objectives, including any prespecified hypotheses                                                                | 5-6         |
| Study design           | #4  | Present key elements of study design early in the paper                                                                         | 7           |
| Setting                | #5  | Describe the setting, locations, and relevant dates, including periods of recruitment, exposure, follow-up, and data collection | 7           |
| Eligibility criteria   | #6a | Give the eligibility criteria, and the sources and methods of selection of participants. Describe methods of follow-up.         | 7           |
|                        | #6b | For matched studies, give matching criteria and number of exposed and                                                           | 7-9         |

|    |                  |           |                                                                            |
|----|------------------|-----------|----------------------------------------------------------------------------|
| 1  |                  | unexposed |                                                                            |
| 2  | Variables        | #7        | Clearly define all outcomes, exposures, predictors, potential              |
| 3  |                  |           | 8-10                                                                       |
| 4  |                  |           | confounders, and effect modifiers. Give diagnostic criteria, if applicable |
| 5  |                  |           |                                                                            |
| 6  | Data sources /   | #8        | For each variable of interest give sources of data and details of methods  |
| 7  | measurement      |           | 8-10                                                                       |
| 8  |                  |           | of assessment (measurement). Describe comparability of assessment          |
| 9  |                  |           | methods if there is more than one group. Give information separately       |
| 10 |                  |           | for for exposed and unexposed groups if applicable.                        |
| 11 |                  |           |                                                                            |
| 12 |                  |           |                                                                            |
| 13 | Bias             | #9        | Describe any efforts to address potential sources of bias                  |
| 14 |                  |           | 17                                                                         |
| 15 | Study size       | #10       | Explain how the study size was arrived at                                  |
| 16 |                  |           | 12                                                                         |
| 17 |                  |           |                                                                            |
| 18 | Quantitative     | #11       | Explain how quantitative variables were handled in the analyses. If        |
| 19 | variables        |           | 7, 10-11                                                                   |
| 20 |                  |           | applicable, describe which groupings were chosen, and why                  |
| 21 |                  |           |                                                                            |
| 22 | Statistical      | #12a      | Describe all statistical methods, including those used to control for      |
| 23 | methods          |           | 10-11                                                                      |
| 24 |                  |           | confounding                                                                |
| 25 |                  | #12b      | Describe any methods used to examine subgroups and interactions            |
| 26 |                  |           | 10-11                                                                      |
| 27 |                  | #12c      | Explain how missing data were addressed                                    |
| 28 |                  |           | 10-11                                                                      |
| 29 |                  | #12d      | If applicable, explain how loss to follow-up was addressed                 |
| 30 |                  |           | 10-11                                                                      |
| 31 |                  | #12e      | Describe any sensitivity analyses                                          |
| 32 |                  |           | 10-11                                                                      |
| 33 |                  |           |                                                                            |
| 34 | Participants     | #13a      | Report numbers of individuals at each stage of study—eg numbers            |
| 35 |                  |           | 12                                                                         |
| 36 |                  |           | potentially eligible, examined for eligibility, confirmed eligible,        |
| 37 |                  |           | included in the study, completing follow-up, and analysed. Give            |
| 38 |                  |           | information separately for for exposed and unexposed groups if             |
| 39 |                  |           | applicable.                                                                |
| 40 |                  | #13b      | Give reasons for non-participation at each stage                           |
| 41 |                  |           | 12                                                                         |
| 42 |                  | #13c      | Consider use of a flow diagram                                             |
| 43 |                  |           | 12                                                                         |
| 44 |                  |           |                                                                            |
| 45 | Descriptive data | #14a      | Give characteristics of study participants (eg demographic, clinical,      |
| 46 |                  |           | 12-14                                                                      |
| 47 |                  |           | social) and information on exposures and potential confounders. Give       |
| 48 |                  |           | information separately for exposed and unexposed groups if applicable.     |
| 49 |                  | #14b      | Indicate number of participants with missing data for each variable of     |
| 50 |                  |           | 12-14                                                                      |
| 51 |                  |           | interest                                                                   |
| 52 |                  | #14c      | Summarise follow-up time (eg, average and total amount)                    |
| 53 |                  |           | 12-14                                                                      |
| 54 |                  |           |                                                                            |
| 55 |                  |           |                                                                            |
| 56 |                  |           |                                                                            |
| 57 |                  |           |                                                                            |
| 58 |                  |           |                                                                            |
| 59 |                  |           |                                                                            |
| 60 |                  |           |                                                                            |

|    |                  |      |                                                                            |       |
|----|------------------|------|----------------------------------------------------------------------------|-------|
| 1  | Outcome data     | #15  | Report numbers of outcome events or summary measures over time.            | 12-14 |
| 2  |                  |      | Give information separately for exposed and unexposed groups if            |       |
| 3  |                  |      | applicable.                                                                |       |
| 4  |                  |      |                                                                            |       |
| 5  |                  |      |                                                                            |       |
| 6  | Main results     | #16a | Give unadjusted estimates and, if applicable, confounder-adjusted          | 12-14 |
| 7  |                  |      | estimates and their precision (eg, 95% confidence interval). Make clear    |       |
| 8  |                  |      | which confounders were adjusted for and why they were included             |       |
| 9  |                  |      |                                                                            |       |
| 10 |                  |      |                                                                            |       |
| 11 |                  |      |                                                                            |       |
| 12 |                  | #16b | Report category boundaries when continuous variables were categorized      | 12-14 |
| 13 |                  |      |                                                                            |       |
| 14 |                  | #16c | If relevant, consider translating estimates of relative risk into absolute | 12-14 |
| 15 |                  |      | risk for a meaningful time period                                          |       |
| 16 |                  |      |                                                                            |       |
| 17 |                  |      |                                                                            |       |
| 18 | Other analyses   | #17  | Report other analyses done—e.g., analyses of subgroups and                 | 12-14 |
| 19 |                  |      | interactions, and sensitivity analyses                                     |       |
| 20 |                  |      |                                                                            |       |
| 21 | Key results      | #18  | Summarise key results with reference to study objectives                   | 15    |
| 22 |                  |      |                                                                            |       |
| 23 |                  |      |                                                                            |       |
| 24 | Limitations      | #19  | Discuss limitations of the study, taking into account sources of potential | 17    |
| 25 |                  |      | bias or imprecision. Discuss both direction and magnitude of any           |       |
| 26 |                  |      | potential bias.                                                            |       |
| 27 |                  |      |                                                                            |       |
| 28 |                  |      |                                                                            |       |
| 29 | Interpretation   | #20  | Give a cautious overall interpretation considering objectives,             | 15-18 |
| 30 |                  |      | limitations, multiplicity of analyses, results from similar studies, and   |       |
| 31 |                  |      | other relevant evidence.                                                   |       |
| 32 |                  |      |                                                                            |       |
| 33 |                  |      |                                                                            |       |
| 34 | Generalisability | #21  | Discuss the generalisability (external validity) of the study results      | 17-18 |
| 35 |                  |      |                                                                            |       |
| 36 |                  |      |                                                                            |       |
| 37 | Funding          | #22  | Give the source of funding and the role of the funders for the present     | 19    |
| 38 |                  |      | study and, if applicable, for the original study on which the present      |       |
| 39 |                  |      | article is based                                                           |       |
| 40 |                  |      |                                                                            |       |
| 41 |                  |      |                                                                            |       |

42 The STROBE checklist is distributed under the terms of the Creative Commons Attribution License CC-BY.  
 43 This checklist was completed on 31. October 2018 using <http://www.goodreports.org/>, a tool made by the  
 44 [EQUATOR Network](#) in collaboration with [Penelope.ai](#)  
 45  
 46  
 47  
 48  
 49  
 50  
 51  
 52  
 53  
 54  
 55  
 56  
 57  
 58  
 59  
 60

# BMJ Open

## The Effects of Epidural Analgesia on Cancer Recurrence and Long-term Mortality in Patients after Non-small-cell Lung Cancer Resection: A Propensity Score-matched Study

|                                 |                                                                                                                                                                                                                                                                                                                                                                                                                                                                                                                                                                                                    |
|---------------------------------|----------------------------------------------------------------------------------------------------------------------------------------------------------------------------------------------------------------------------------------------------------------------------------------------------------------------------------------------------------------------------------------------------------------------------------------------------------------------------------------------------------------------------------------------------------------------------------------------------|
| Journal:                        | <i>BMJ Open</i>                                                                                                                                                                                                                                                                                                                                                                                                                                                                                                                                                                                    |
| Manuscript ID                   | bmjopen-2018-027618.R1                                                                                                                                                                                                                                                                                                                                                                                                                                                                                                                                                                             |
| Article Type:                   | Research                                                                                                                                                                                                                                                                                                                                                                                                                                                                                                                                                                                           |
| Date Submitted by the Author:   | 19-Mar-2019                                                                                                                                                                                                                                                                                                                                                                                                                                                                                                                                                                                        |
| Complete List of Authors:       | Wu, Hsiang-Ling; Taipei Veterans General Hospital; National Yang-Ming University<br>Tai, Ying-Hsuan; Taipei Veterans General Hospital; Taipei Medical University Shuang Ho Hospital<br>Chan, Min-Ya; Taipei Veterans General Hospital; National Taiwan Normal University<br>Tsou, Mei-Yung; Taipei Veterans General Hospital; National Yang-Ming University<br>Chen, Tony Hsiu-Hsi; National Taiwan University, Division of Biostatistics, College of Public<br>Chang, Kuang-Yi; Taipei Veterans General Hospital, Department of Anesthesiology; National Yang-Ming University, School of Medicine |
| <b>Primary Subject Heading</b>: | Anaesthesia                                                                                                                                                                                                                                                                                                                                                                                                                                                                                                                                                                                        |
| Secondary Subject Heading:      | Surgery                                                                                                                                                                                                                                                                                                                                                                                                                                                                                                                                                                                            |
| Keywords:                       | Epidural Analgesia, Cancer, Recurrence, Mortality, Non-small-cell Lung Carcinoma, Propensity Score                                                                                                                                                                                                                                                                                                                                                                                                                                                                                                 |
|                                 |                                                                                                                                                                                                                                                                                                                                                                                                                                                                                                                                                                                                    |

SCHOLARONE™  
Manuscripts



1  
2  
3  
4 **The Effects of Epidural Analgesia on Cancer Recurrence and Long-term Mortality in**  
5  
6  
7 **Patients after Non-small-cell Lung Cancer Resection: A Propensity Score-matched**  
8  
9  
10 **Study**

11  
12  
13 Hsiang-Ling Wu<sup>1, 2</sup>, Ying-Hsuan Tai<sup>1, 2, 3, 4</sup>, Min-Ya Chan<sup>1, 5</sup>, Mei-Yung Tsou<sup>1, 2</sup>, Hsiu-Hsi  
14  
15  
16 Chen<sup>6</sup>, Kuang-Yi Chang<sup>1, 2, \*</sup>

17  
18  
19 <sup>1</sup> Department of Anesthesiology, Taipei Veterans General Hospital, Taipei, Taiwan

20  
21 <sup>2</sup> School of Medicine, National Yang-Ming University, Taipei, Taiwan

22  
23 <sup>3</sup> Department of Anesthesiology, Shuang Ho Hospital, Taipei Medical University, New Taipei  
24  
25  
26 City, Taiwan

27  
28 <sup>4</sup> Department of Anesthesiology, School of Medicine, College of Medicine, Taipei Medical  
29  
30  
31 University, Taipei, Taiwan.

32  
33 <sup>5</sup> Department of Technology Application and Human Resource Development, National  
34  
35  
36 Taiwan Normal University, Taipei, Taiwan

37  
38 <sup>6</sup> Division of Biostatistics, Graduate Institute of Epidemiology and Preventive Medicine,  
39  
40  
41 College of Public Health, National Taiwan University, Taipei, Taiwan

42  
43  
44  
45 \* Corresponding author

46  
47  
48 **Word count:** Text (2864)

49  
50  
51 **Correspondence to**

52  
53  
54 Dr. Chang: [kychang@vghtpe.gov.tw](mailto:kychang@vghtpe.gov.tw)

55  
56  
57  
58  
59  
60 Department of Anesthesiology, Taipei Veterans General Hospital, No. 201, Sec. 2, Shih-pai  
Rd., Taipei 11217, Taiwan. Tel: +886-2-28757549; Fax: +886-2-28751597

## Abstract

**Objectives:** Previous studies showed reductions in recurrence and mortality rate of several cancer types in patients receiving perioperative epidural analgesia. This study aimed to investigate the effects of thoracic epidural analgesia on oncologic outcomes after resection for lung cancer.

**Design:** Retrospective study using propensity score matching methodology.

**Setting:** Single medical centre in Taiwan.

**Participants:** Patients with stage I-III non-small-cell lung cancer undergoing primary tumour resection between January 2005 and December 2015 and had either epidural analgesia, placed preoperatively and used intra- and postoperatively, or intravenous analgesia were evaluated through May 2017.

**Primary and secondary outcome measures:** Primary endpoint was postoperative recurrence-free survival and secondary endpoint was overall survival.

**Results:** The 3-yr recurrence-free and overall survival rates were 69.8% (95% CI: 67.4 – 72.2%) and 92.4% (95% CI: 91 – 93.8%) in the epidural group and 67.4% (95% CI: 62.3 – 72.5%) and 89.6% (95% CI: 86.3 – 92.9%) in the non-epidural group, respectively.

Multivariable Cox regression analysis before matching demonstrated no significant difference in recurrence or mortality between groups (adjusted hazard ratio: 0.93, 95% CI: 0.76 – 1.14 for recurrence; 0.81, 95% CI: 0.58 – 1.13 for mortality), similar to the results after matching

1  
2  
3  
4 (hazard ratio: 0.97, 95% CI: 0.71 – 1.31; 0.94, 95% CI: 0.57 – 1.54). Independent risk factors  
5  
6  
7 for both recurrence and mortality were male, higher pretreatment carcinoembryonic antigen  
8  
9  
10 level, advanced cancer stage, poor differentiation, lymphovascular invasion, microscopic  
11  
12  
13 necrosis, and postoperative radiotherapy.  
14  
15

16 **Conclusions:** Thoracic epidural analgesia was not associated with better recurrence-free or  
17  
18  
19 overall survival in patients receiving surgical resection for stage I-III non-small-cell lung  
20  
21  
22 cancer.  
23  
24

25 **Keywords:** Cancer; Epidural Analgesia; Mortality; Non-small-cell Lung Carcinoma;  
26  
27  
28 Propensity Score; Recurrence  
29  
30  
31  
32  
33  
34  
35  
36  
37  
38  
39  
40  
41  
42  
43  
44  
45  
46  
47  
48  
49  
50  
51  
52  
53  
54  
55  
56  
57  
58  
59  
60

## Article Summary

### Strengths and limitations of this study

1. Large sample size and long follow-up time were employed to evaluate the impacts of epidural analgesia on long-term outcomes after lung cancer surgery.
2. Propensity score matching was used to deal with possible imbalances in collected variables.
3. Epidural assignment was not randomized, clinical care was not standardized and potential selection bias cannot be ruled out.
4. Effects of unmeasured confounders on outcomes after lung cancer surgery cannot be further evaluated.

## Introduction

Lung cancer is the most commonly diagnosed malignancy worldwide, and its incidence continues to grow.<sup>1</sup> An estimated 2.1 million new cases of lung cancer were diagnosed and 1.76 million lung cancer deaths occurred globally in 2018.<sup>1</sup> Surgical removal of the primary tumour is the mainstay of treatment for patients with non-small-cell lung cancer staged I through IIIA.<sup>2</sup> However, surgical dissection and manipulation are associated with unintentional dispersal of cancer cells into the blood and lymphatic systems.<sup>3</sup> Whether the residual neoplastic cell would develop into a metastasis depends on the perioperative immune competence of the patient. Surgically induced stress hormone, as well as inhaled volatile anesthetics and systemic opioids, can diminish natural killer cell function, the primary defense against cancer cells.<sup>4</sup>

Opioids inhibit components of both cell-mediated and humoral immunity.<sup>5</sup> Morphine also has proangiogenic properties that may promote dissemination of angiogenesis-dependent tumours.<sup>6</sup> Inflammatory cytokines have been shown to regulate the expression of the mu-opioid receptor (MOR) gene, highlighting an interaction between the opioid and immune systems.<sup>7</sup> It is noted that the MOR is over-expressed in several types of lung cancer and it promotes opioid- and growth factor-induced proliferation and migration in human lung cancer cells.<sup>8</sup> Furthermore, silencing the MOR greatly reduced opioid-induced tumour growth and metastasis in vitro.<sup>9</sup>

1  
2  
3  
4 Anesthetic management in primary cancer surgery has been proposed to impact recurrence or  
5  
6  
7 metastases, including blood transfusion,<sup>10</sup> narcotics consumption,<sup>11-13</sup> and analgesic  
8  
9  
10 techniques.<sup>14</sup> Thoracic epidural analgesia, commonly used for the management of  
11  
12  
13 postoperative pain, has been shown to reduce mortality, respiratory complications and opioid  
14  
15  
16 consumption and improved time to ambulation in thoracic surgeries.<sup>15</sup> However, the effect of  
17  
18  
19 epidural analgesia on oncologic outcomes after lung cancer resection remains unclear. It is  
20  
21  
22 hypothesized that epidural analgesia may reduce tumour growth and spread through its opioid  
23  
24  
25 and general anesthetic sparing and surgical stress alleviating properties, but only one  
26  
27  
28 retrospective study with limited sample size is available for this issue.<sup>16</sup> Therefore, we  
29  
30  
31 conducted this retrospective cohort study to investigate the relationship between perioperative  
32  
33  
34 thoracic epidural analgesia and cancer recurrence or overall survival in patients following  
35  
36  
37 surgical resection for non-small-cell lung cancer. The effects of other major prognostic factors  
38  
39  
40 were assessed as well to determine the significant predictors of oncologic outcomes after lung  
41  
42  
43 cancer resection.  
44  
45  
46  
47  
48  
49  
50  
51  
52  
53  
54  
55  
56  
57  
58  
59  
60

## Methods

### *Setting and patient selection*

The study was approved by the Institutional Review Board of Taipei Veterans General Hospital, Taipei, Taiwan (IRB-TPEVGH No. 2015-11-010CC) and written informed consent was waived. Patients undergoing surgical resection of pulmonary neoplasms between January 2005 and December 2015 at our hospital were retrospectively identified from the institutional electronic medical database. Patients with secondary lung cancer, small cell lung cancer, stage IV disease determined at the time of surgery, or missing data about demographics, pathologic details or postoperative analgesic were excluded from the study. (Figure 1) Patients were analysed in two groups: those receiving general anaesthesia with perioperative epidural analgesia and their counterparts receiving general anaesthesia without epidural analgesia.

### *Analgesia management*

All patients undergoing open thoracotomy or video-assisted thoracoscopic surgery at our hospital were offered the choice of epidurals with preoperative catheter placement or intravenous analgesia with a demand pump. If epidural analgesia was selected, an epidural catheter was typically placed at a middle thoracic region (e.g., T6–T8) and assessed its function with a test dose of local anesthetic preoperatively. Epidural analgesia was started intraoperatively with local anesthetic (bupivacaine 0.25% or 0.5%) with or without fentanyl  $1\text{--}2\ \mu\text{g}\cdot\text{mL}^{-1}$  at an infusion rate of  $5\text{--}10\ \text{ml}\cdot\text{hour}^{-1}$ , continued postoperatively for 48 to 72

1  
2  
3  
4 hours, and switched to oral acetaminophen or non-steroidal anti-inflammatory drugs  
5  
6  
7 thereafter. Typically, patients undergoing lung cancer surgery received intravenous fentanyl  
8  
9  
10 50 to 150 µg for anesthetic induction. Patients with effective epidurals were rarely given  
11  
12  
13 additional opioids perioperatively. If patients refused epidurals or it was contraindicated, an  
14  
15  
16 intravenous patient-controlled analgesia was administered via an ambulatory infusion pump  
17  
18  
19 (Gemstar™ Yellow, Hospira, IL, USA) programmed to deliver morphine sulfate 1 mg·mL<sup>-1</sup> in  
20  
21  
22 normal saline, at a demand dose of 1 mg with a lockout time of 6 minutes.  
23  
24

### 25 ***Data retrieval***

26  
27  
28 An electronic medical database was used to determine the baseline clinicopathologic risk  
29  
30  
31 factors for cancer recurrence and mortality. The following data were obtained from medical  
32  
33  
34 records: demographic characteristics; the Eastern Cooperative Oncology Group (ECOG)  
35  
36  
37 performance score;<sup>17</sup> co-existing diseases (chronic obstructive pulmonary disease, diabetes,  
38  
39  
40 chronic kidney disease, etc); preoperative pulmonary function tests (forced vital capacity,  
41  
42  
43 forced expiratory volume in one second, and their predicted percentages); pretreatment  
44  
45  
46 carcinoembryonic antigen (CEA) level;<sup>18</sup> anaesthesia time, perioperative packed red blood  
47  
48  
49 cell (pRBC) transfusion;<sup>19</sup> pathologic features (tumour differentiation, microscopic necrosis,<sup>20</sup>  
50  
51  
52 lymphovascular invasion,<sup>21</sup> and perineural invasion);<sup>22</sup> whether preoperative or postoperative  
53  
54  
55 adjuvant chemotherapy or radiotherapy was used; and each patient's current status as  
56  
57  
58 determined by documentation of follow-up visits to the hospital's outpatient clinic or  
59  
60



1  
2  
3  
4 subsequent admissions. Tumour nodes metastasis (TNM) staging was also obtained from the  
5  
6  
7 record and translated into stage I to III according to the American Joint Committee on Cancer  
8  
9  
10 criteria (AJCC-7 staging system).<sup>23</sup> Adjuvant therapies given in the form of chemotherapy  
11  
12  
13 (cisplatin-gemcitabine, cisplatin-paclitaxel, cisplatin-docetaxel, or carboplatin-paclitaxel) or  
14  
15  
16 radiotherapy were at the discretion of surgeons and patients, and was defined as any therapy  
17  
18  
19 given within 90 days of surgery. The radiologists and thoracic surgeons of our hospital  
20  
21  
22 determined whether cancer recurred or not, which was mainly based on imaging studies  
23  
24  
25 (computed tomography, magnetic resonance imaging, bone scan, etc.) and defined by  
26  
27  
28 response evaluation criteria in solid tumours (RECIST) guidelines.<sup>24</sup> Pathology-proven  
29  
30  
31 second primary lung cancer was not considered as a recurrent disease. At our hospital, close  
32  
33  
34 surveillance was performed for survivors of lung cancer following definitive surgical therapy,  
35  
36  
37 including chest computed tomography every 6 months for at least the first 2 years, and  
38  
39  
40 annually thereafter. The follow-up rates of this cohort were 95.3%, 88.7%, and 78.8% in the  
41  
42  
43 end of the postoperative first, third, and fifth year, respectively. (Supplementary Table 1) The  
44  
45  
46 date of death was determined based on medical record or death certificate.

47  
48  
49 Medical records of all the patients included were extracted by specialist anesthesiologists who  
50  
51  
52 were not involved in data analysis. The quality of the extracted data was verified through  
53  
54  
55 random sampling by the authors. Data were collected up to the end of May 2017.

56  
57  
58 The primary endpoint was recurrence-free survival, which was defined as time from the date  
59  
60

1  
2  
3  
4 of surgery to the date of cancer recurrence. The secondary endpoint was overall survival,  
5  
6  
7 defined as time from the date of surgery to the date of death. For those without the event of  
8  
9  
10 cancer recurrence or death, their survival times were regarded as the corresponding censored  
11  
12  
13 observations with the last visit date used as the censored date.

### 14 15 16 ***Statistical analysis***

17  
18  
19 The comparisons of patient characteristics between the epidural and non-epidural groups were  
20  
21  
22 performed using chi-square tests for categorical variables and either t tests or Wilcoxon rank  
23  
24  
25 sum tests for continuous variables, as appropriate. The Kaplan-Meier method and log rank  
26  
27  
28 test were used to compare recurrence-free and overall survival distributions between the two  
29  
30  
31 groups. Univariate Cox regression analysis was used to evaluate the effects of epidural  
32  
33  
34 analgesia and other variables collected in the study on recurrence-free or overall survival.  
35  
36  
37 Significant predictors of recurrence-free or overall survival in the univariate analysis were  
38  
39  
40 used as candidates for stepwise model selection processes in the following multivariable  
41  
42  
43 analysis. The entry and exit criteria of significance level were set at 0.05 and 0.1, respectively,  
44  
45  
46 to select factors associated with recurrence-free and overall survival in the multivariable  
47  
48  
49 analysis. Afterward the effects of epidural analgesia adjusted for the selected predictors in the  
50  
51  
52 multivariable analysis on recurrence-free and overall survival were further evaluated.

53  
54  
55 To account for the potential imbalance in measured confounders related to cancer recurrence  
56  
57  
58 or survival of lung cancer between epidural and non-epidural groups, propensity scores based  
59  
60

1  
2  
3  
4 on a collection of patient characteristics was developed to estimate the probability of  
5  
6  
7 receiving epidurals (Supplementary Table 2). Propensity score matching was performed as the  
8  
9  
10 primary analysis using a caliper with width equal to 0.2 of the standard deviation of the logit  
11  
12  
13 of the propensity score to ensure sufficient balance in collected variables between matching  
14  
15  
16 pairs.<sup>25</sup> Imbalance of the distribution of baseline attributes between groups was measured by  
17  
18  
19 standardized difference (SD), the difference in mean, proportion or rank divided by the pooled  
20  
21  
22 standard error, expressed as percentage, and was defined as absolute value greater than 20.<sup>26</sup>  
23  
24  
25 For sensitivity analysis, all subjects were divided into five equal-size groups using the  
26  
27  
28 quintiles of the estimated propensity score and stratified Cox regression analysis was  
29  
30  
31 conducted to obtain a pooled hazard ratio across the five strata to ensure the consistency  
32  
33  
34 among different estimates of the effects of epidurals on cancer recurrence or overall survival.  
35  
36  
37 The significance level of all hypotheses was 0.05 for a two-sided test. IBM SPSS Statistics for  
38  
39  
40 Windows Version 22.0 (Armonk, NY: IBM Corp.) was used for all analyses.

### 41 42 43 ***Patient and public involvement***

44  
45  
46 This study is a retrospective analysis using the institutional medical database. There was no  
47  
48  
49 patient involved in the recruitment to and conduct of the study.  
50  
51  
52  
53  
54  
55  
56  
57  
58  
59  
60

## Results

Total of 2191 patients were included in this study and 1799 (82.1%) of them received epidural analgesia. There were some differences in the distributions of baseline characteristics between groups, including less thoracoscopic surgery (SD = 36.1) and longer follow-up time (SD = 20.4) in epidural group. (Table 1) The rate of epidural placement declined because more resections of lung cancer were done with thoracoscopic technique at our hospital in recent years. (Supplementary Table 3) Those not receiving epidurals, as mentioned above, had intravenous patient-controlled opioid analgesia. Table 2 shows the details of cancer stages and pathologic features of the two groups. The epidural group had higher rate of lymphocytic infiltration. After propensity score matching, the final sample of 372 matched pairs of patients was analysed, and no significant difference was found in demographic or pathologic characteristics between groups. (Table 1)

### *Association between Thoracic Epidural Analgesia and Recurrence-free Survival*

The 3-yr and 5-yr recurrence-free survival were 69.8% (95% CI: 67.4 – 72.2%) and 64.4% (95% CI: 61.9 – 66.9%) in the epidural group and 67.4% (95% CI: 62.3 – 72.5%) and 62.8% (95% CI: 57.1 – 68.5%) in the non-epidural group, respectively. No significant difference in the distribution of recurrence-free survival after lung cancer surgery was noted when comparing epidural with non-epidural group ( $p = 0.54$  by log rank test, Figure 2A). Moreover, epidural analgesia was not associated with better recurrence-free survival in patients stratified

1  
2  
3  
4 by cancer stages (Figure. 2B).

5  
6  
7 The multivariable regression model indicated eight independent prognostic factors, including  
8  
9  
10 male (HR: 1.30), pretreatment CEA level (HR: 1.26, on base-10 logarithmic scale), cancer  
11  
12 stage (II vs. I, HR: 1.93; III vs. I, HR: 2.85), tumour differentiation (moderate vs. good, HR:  
13  
14 3.75; poor vs. good, HR: 5.20), microscopic tumour necrosis (HR: 1.44), pathologic  
15  
16 lymphovascular invasion (HR: 2.05), and postoperative chemotherapy (HR: 1.46) and  
17  
18 radiotherapy (HR: 1.44). (Table 3) Adjusting for other covariates, the effect of epidurals on  
19  
20 recurrence-free survival after lung cancer surgery was non-significant (HR: 0.93, 95% CI:  
21  
22 0.76 – 1.14,  $p = 0.47$ ) in the multivariable analysis, similar to the results after  
23  
24 propensity-score matching (hazard ratio: 0.97, 95% CI: 0.71 – 1.3,  $p = 0.82$ ) and the  
25  
26 quintile-stratified analysis (pooled HR: 0.94, 95% CI: 0.76 – 1.15,  $p = 0.53$ ).

### 27 28 29 30 31 32 33 34 35 36 37 *Association between Thoracic Epidural Analgesia and Overall Survival*

38  
39  
40 The 3-yr and 5-yr overall survival were 92.4% (95% CI: 91 – 93.8%) and 85.8% (95% CI:  
41  
42 83.8 – 87.8%) in the epidural group and 89.6% (95% CI: 86.3 – 92.9%) and 84.3% (95% CI:  
43  
44 80 – 88.6%) in the non-epidural group.

45  
46  
47  
48  
49 No significant difference in the distribution of long-term mortality after lung cancer surgery  
50  
51 was found between the epidural and non-epidural groups (Figure 2C,  $p = 0.13$  by log rank  
52  
53 test). In addition, no significant difference in overall survival was noted between the two  
54  
55 groups in the subgroup analysis for distinct cancer stages (Figure 2D).

1  
2  
3  
4 Nine independent prognostic factors were identified after the multivariable analysis (Table 3),  
5  
6 including male (HR: 1.97), ECOG performance score  $\geq 1$  (HR: 1.49), pretreatment CEA level  
7  
8 (HR: 1.67), cancer stage (II vs. I HR: 2.06; III vs. I, HR: 2.96), perioperative pRBC  
9  
10 transfusion (HR: 1.40), tumour differentiation (moderate vs. good, HR: 4.72; poor vs. good,  
11  
12 HR: 6.17), microscopic necrosis (HR: 1.38), pathologic lymphovascular invasion (HR: 2.13),  
13  
14 and postoperative radiotherapy (HR: 1.81). Multivariable analysis indicated no association  
15  
16 between epidural analgesia and mortality in non-small-cell lung cancer after surgery (HR:  
17  
18 0.81, 95% CI: 0.58 – 1.13,  $p = 0.21$ ). Propensity score matching generated similar results to  
19  
20 the multivariable regression analysis (HR: 0.94, 95% CI: 0.57 – 1.54,  $p = 0.8$ ) as well as the  
21  
22 quintile-stratified (HR: 0.8, 95% CI: 0.58 – 1.1,  $p = 0.17$ ) propensity score analyses.  
23  
24  
25  
26  
27  
28  
29  
30  
31  
32  
33  
34  
35  
36  
37  
38  
39  
40  
41  
42  
43  
44  
45  
46  
47  
48  
49  
50  
51  
52  
53  
54  
55  
56  
57  
58  
59  
60

## Discussion

To our knowledge, this is the largest retrospective study applying propensity scoring methods to evaluate the impacts of epidural analgesia on oncologic outcomes after lung cancer surgery.

We found no evidence that epidural analgesia was associated with improved recurrence-free survival or overall survival in patients following surgical resection of non-small-cell lung cancer. Major clinicopathologic prognostic factors were also taken into account in this study to estimate the adjusted effects of epidurals and avoid potential confounding effects from unbalanced distributions of important risk factors between the epidural group and its counterpart. From the perspective of methodology, we used propensity score matching to cancel out the potential imbalances in baseline characteristics and obtained similar results with those from traditional multivariable model. The combination of both analytical methods provided more persuasive proof than either of them did. Our study provided valuable information to reject the hypothesis of beneficial effect of epidurals on cancer recurrence or long-term survival after surgical resection of non-small-cell lung cancer with large sample size and considerable prognostic factors which were lacked in the previous survey.<sup>16</sup>

Perioperative immune function is an important determinant for metastases after cancer resection surgery. Anesthetic management of cancer patients could impact long-term outcome, and potentially beneficial interventions include minimizing the use of volatile anesthetics and blood transfusion, administration of cyclooxygenase antagonists and statin, and hypothermia

1  
2  
3  
4 therapy.<sup>27</sup> However, whether regional analgesia reduces cancer recurrence after resection  
5  
6  
7 surgery remains inconclusive. The Cochrane review included four post-hoc analyses of  
8  
9  
10 previous controlled trials and indicated that current evidence for the benefit of regional  
11  
12  
13 anaesthesia on cancer outcome is inadequate due to limitations of study design and  
14  
15  
16 incomplete consideration of confounders.<sup>28</sup>

17  
18  
19 Although Cata and colleagues reported null results of epidural analgesia on recurrence-free  
20  
21  
22 and overall survival after lung cancer surgery,<sup>16</sup> they found an association between the  
23  
24  
25 intraoperative opioid consumption and recurrence-free survival or overall survival later only  
26  
27  
28 for stage I disease.<sup>11</sup> Our results did not support beneficial effects of epidural analgesia on  
29  
30  
31 oncologic outcomes in patients stratified by cancer stages. This may be attributed to the  
32  
33  
34 difference in distributions of patient attributes or treatment modality. Maher and co-workers  
35  
36  
37 reported an association between increased opioid doses during initial 96-hours postoperative  
38  
39  
40 period and higher recurrence rate of non-small-cell lung cancer within 5 years.<sup>12</sup> However,  
41  
42  
43 they found no difference in intraoperative opioid administration among those with or without  
44  
45  
46 recurrence of lung cancer at the 5-year follow-up. The effects of regional block and opioid  
47  
48  
49 doses on long-term cancer outcomes in early-stage lung cancer await further investigation.

50  
51  
52 Our results showed perioperative blood transfusion is a risk factor for all-cause mortality, in  
53  
54  
55 line with previous literature.<sup>19</sup> In addition to mortality, allogenic blood transfusion may be  
56  
57  
58 associated with increased risk of cancer recurrence.<sup>29</sup> Transfused leucocytes can lead to  
59  
60



1  
2  
3  
4 immunomodulation, including changes in circulating lymphocytes, helper T-cell, suppressor  
5  
6  
7 T-cell ratios, and B-cell function.<sup>29</sup> The meta-analysis by Churchhouse and colleagues  
8  
9  
10 examined the effect of blood transfusion on cancer recurrence and overall survival in patients  
11  
12  
13 undergoing surgical resection of lung cancer in 5378 patients. Though no definitive  
14  
15  
16 conclusions could be drawn, there appeared to be a relationship between transfusion and  
17  
18  
19 reduction of disease-free survival.<sup>30</sup> In our analysis, the association between blood transfusion  
20  
21  
22 and recurrence was non-significant after adjustment for covariates. This finding may imply  
23  
24  
25 that the potential impacts of other important confounders (e.g., disease severity, presence of  
26  
27  
28 postoperative complications) may have a greater bearing on prognosis than the reception of  
29  
30  
31 blood itself.

32  
33  
34 As a sided observation, in the study period, the use of epidurals gradually decreased with  
35  
36  
37 concomitant increasing uses of thoracoscopic surgery. Thoracoscopic pulmonary resection for  
38  
39  
40 primary lung cancer has been demonstrated to achieve less postoperative pain, faster  
41  
42  
43 recovery, shorter hospitalization, and long-term survival comparable to that of open  
44  
45  
46 thoracotomy.<sup>31,32</sup> In our analysis, the distributions of thoracoscopic surgery and year of  
47  
48  
49 surgery between groups have been balanced after propensity score matching and are therefore  
50  
51  
52 unlikely to affect the results.

53  
54  
55 Several limitations are inherent in this retrospective observational study. First, patients were  
56  
57  
58 not randomized and clinical care was not standardized, so that potential selection bias and  
59  
60

1  
2  
3  
4 effects from unmeasured confounders cannot be excluded. Second, relatively small  
5  
6  
7 percentage (17.9%) of the patients was cared for without epidural analgesia. Third, the rate of  
8  
9  
10 epidural placement was lower in the latter years and this may result in longer follow-up  
11  
12  
13 period of epidural group. However, these imbalances have been cancelled out after propensity  
14  
15  
16 score matching. Fourth, it is difficult to determine the total narcotic consumptions for each  
17  
18  
19 patient due to the incompleteness of our electronic medical records.

20  
21  
22 In conclusion, our study rejected the association between epidural analgesia and cancer  
23  
24  
25 recurrence or long-term mortality in patients after surgery for stage I through III  
26  
27  
28 non-small-cell lung cancer. Prospective randomized trials are warranted to confirm or refute  
29  
30  
31 causal relationships between epidural analgesia and the long-term outcomes after lung cancer  
32  
33  
34 surgery.  
35  
36  
37  
38  
39  
40  
41  
42  
43  
44  
45  
46  
47  
48  
49  
50  
51  
52  
53  
54  
55  
56  
57  
58  
59  
60

## Footnotes

**Author contributors:** The author contributions were as follows: HLW and YHT contributed to data acquisition and manuscript drafting. MYC helped in data verification. MYT helped revise the manuscript. HHC contributed to study design and statistical analysis. KYC contributed to statistical review, manuscript revision, and final approval of the version to be published. All authors read and approved the final manuscript.

**Funding:** This work was supported by the grants from Taipei Veterans General Hospital, Taipei, Taiwan (V105C-050) and Ministry of Science and Technology, Taipei, Taiwan (MOST 104-2314-B-075-015).

**Competing interests:** None declared.

**Patient consent:** Not required.

**Ethics approval:** The study was approved by the Institutional Review Board of Taipei Veterans General Hospital, Taipei, Taiwan.

**Provenance and peer review:** Not commissioned; externally peer reviewed.

**Data sharing statement:** No additional data are available.

## References

1. World Health Organization, International Agency for Research on Cancer. GLOBOCAN: Estimated Cancer Incidence, Mortality and Prevalence Worldwide in 2018. <http://gco.iarc.fr/today/fact-sheets-cancers> (accessed Mar 15, 2019).
2. Molina JR, Yang P, Cassivi SD, Schild SE, Adjei AA. Non-small cell lung cancer: epidemiology, risk factors, treatment, and survivorship. *Mayo Clin Proc.* 2008;83:584-94.
3. Lloyd JM, McIver CM, Stephenson SA, et al. Identification of early-stage colorectal cancer patients at risk of relapse post-resection by immunobead reverse transcription-PCR analysis of peritoneal lavage fluid for malignant cells. *Clin Cancer Res.* 2006;12:417-23.
4. Gupta K, Kshirsagar S, Chang L, et al. Morphine stimulates angiogenesis by activating proangiogenic and survival-promoting signaling and promotes breast tumor growth. *Cancer Res.* 2002;62:4491-8.
5. Boland JW, Pockley AG. Influence of opioids on immune function in patients with cancer pain: from bench to bedside. *Br J Pharmacol.* 2018;175:2726-36.
6. Colvin LA, Fallon MT, Buggy DJ. Cancer biology, analgesics, and anaesthetics: is there a link? *Br J Anaesth.* 2012;109:140-3.
7. Yeager MP, Colacchio TA, Yu CT, et al. Morphine inhibits spontaneous and cytokine-enhanced natural killer cell cytotoxicity in volunteers. *Anesthesiology.* 1995;83:500-8.

- 1  
2  
3  
4 8. Lennon FE, Mirzapioazova T, Mambetsariev B, et al. The Mu opioid receptor promotes  
5  
6  
7 opioid and growth factor-induced proliferation, migration and Epithelial Mesenchymal  
8  
9  
10 Transition (EMT) in human lung cancer. *PLoS One*. 2014;9:e91577.  
11  
12  
13 9. Mathew B, Lennon FE, Siegler JH, et al. Novel role of the Mu Opioid receptor in lung  
14  
15  
16 cancer progression: a laboratory study. *Anesth Analg*. 2011;112:558-67.  
17  
18  
19 10. Wu HL, Tai YH, Lin SP, et al. The Impact of Blood Transfusion on Recurrence and  
20  
21  
22 Mortality Following Colorectal Cancer Resection: A Propensity Score Analysis of 4,030  
23  
24  
25 Patients. *Sci Rep*. 2018;8:13345.  
26  
27  
28 11. Cata JP, Keerty V, Keerty D, et al. A retrospective analysis of the effect of intraoperative  
29  
30  
31 opioid dose on cancer recurrence after non-small cell lung cancer resection. *Cancer Med*.  
32  
33  
34 2014;3:900-8.  
35  
36  
37 12. Maher DP, Wong W, White PF, et al. Association of increased postoperative opioid  
38  
39  
40 administration with non-small-cell lung cancer recurrence: a retrospective analysis. *Br J*  
41  
42  
43 *Anaesth*. 2014;113:i88-i94.  
44  
45  
46 13. Tai YH, Wu HL, Chang WK, et al. Intraoperative Fentanyl Consumption Does Not  
47  
48  
49 Impact Cancer Recurrence or Overall Survival after Curative Colorectal Cancer  
50  
51  
52 Resection. *Sci Rep*. 2017;7:10816.  
53  
54  
55 14. Tai YH, Chang WK, Wu HL, et al. The effect of epidural analgesia on cancer progression  
56  
57  
58 in patients with stage IV colorectal cancer after primary tumor resection: A retrospective  
59  
60

- 1  
2  
3  
4 cohort study. *PLoS One*. 2018;13:e0200893.  
5  
6  
7 15. Pöpping DM, Elia N, Marret E, Remy C, Tramèr MR. Protective effects of epidural  
8  
9 analgesia on pulmonary complications after abdominal and thoracic surgery: a  
10  
11 meta-analysis. *Arch Surg*. 2008;143:990-9.  
12  
13  
14  
15  
16 16. Cata JP, Gottumukkala V, Thakar D, et al. Effects of postoperative epidural analgesia on  
17  
18 recurrence-free and overall survival in patients with nonsmall cell lung cancer. *J Clin*  
19  
20  
21  
22  
23  
24  
25 17. Hoang T, Xu R, Schiller JH, Bonomi P, Johnson DH. Clinical model to predict survival in  
26  
27  
28  
29  
30  
31  
32  
33  
34  
35  
36  
37  
38  
39  
40  
41  
42  
43  
44  
45  
46  
47  
48  
49  
50  
51  
52  
53  
54  
55  
56  
57  
58  
59  
60
- chemonaive patients with advanced non-small-cell lung cancer treated with  
third-generation chemotherapy regimens based on eastern cooperative oncology group  
data. *J Clin Oncol*. 2005;23:175-83.
18. Grunnet M, Sorensen JB. Carcinoembryonic antigen (CEA) as tumor marker in lung  
cancer. *Lung Cancer*. 2012;76:138-43.
19. Glance LG, Dick AW, Mukamel DB, et al. Association between intraoperative blood  
transfusion and mortality and morbidity in patients undergoing noncardiac surgery.  
*Anesthesiology*. 2011;114:283-92.
20. Park SY, Lee HS, Jang HJ, et al. Tumor necrosis as a prognostic factor for stage IA  
non-small cell lung cancer. *Ann Thorac Surg*. 2011;91:1668-73.
21. Higgins KA, Chino JP, Ready N, et al. Lymphovascular invasion in non-small-cell lung

- 1  
2  
3  
4 cancer: implications for staging and adjuvant therapy. *J Thorac Oncol.* 2012;7:1141-7.  
5  
6  
7 22. Yilmaz A, Duyar SS, Cakir E, et al. Clinical impact of visceral pleural, lymphovascular  
8  
9 and perineural invasion in completely resected non-small cell lung cancer. *Eur J*  
10  
11  
12  
13 *Cardiothorac Surg.* 2011;40:664-70.  
14  
15  
16 23. Edge SB, Byrd SR, Compton CC, et al. AJCC Cancer Staging Manual. 7th ed. New York,  
17  
18  
19 NY: Springer-Verlag, 2010.  
20  
21  
22 24. Eisenhauer EA, Therasse P, Bogaerts J, et al. New response evaluation criteria in solid  
23  
24  
25 tumours: revised RECIST guideline (version 1.1). *Eur J Cancer.* 2009;45:228-47.  
26  
27  
28 25. Austin PC. An introduction to propensity score methods for reducing the effects of  
29  
30  
31 confounding in observational studies. *Multivariate Behav Res.* 2011;46:399-424.  
32  
33  
34 26. Austin PC. Balance diagnostics for comparing the distribution of baseline covariates  
35  
36  
37 between treatment groups in propensity-score matched samples. *Stat Med.*  
38  
39  
40 2009;28:3083-107.  
41  
42  
43 27. Heaney Á, Buggy DJ. Can anaesthetic and analgesic techniques affect cancer recurrence  
44  
45  
46 or metastasis? *Br J Anaesth.* 2012;109:i17-i28.  
47  
48  
49 28. Cakmakkaya OS, Kolodzie K, Apfel CC, Pace NL. Anaesthetic techniques for risk of  
50  
51  
52 malignant tumour recurrence. *Cochrane Database Syst Rev.* 2014:CD008877.  
53  
54  
55 29. Weber RS, Jabbour N, Martin RCG. Anemia and transfusions in patients undergoing  
56  
57  
58 surgery for cancer. *Ann Surg Oncol.* 2008;15:34-45.  
59  
60

- 1  
2  
3  
4 30. Churchhouse AMD, Mathews TJ, McBride OMB, Dunning J. Does blood transfusion  
5  
6  
7 increase the chance of recurrence in patients undergoing surgery for lung cancer? *Interact*  
8  
9  
10 *Cardiovasc Thorac Surg.* 2012;14:85-90.  
11  
12  
13 31. Bendixen M, Jørgensen OD, Kronborg C, Andersen C, Licht PB. Postoperative pain and  
14  
15  
16 quality of life after lobectomy via video-assisted thoracoscopic surgery or anterolateral  
17  
18  
19 thoracotomy for early stage lung cancer: a randomised controlled trial. *Lancet Oncol.*  
20  
21  
22 2016;17:836-44.  
23  
24  
25 32. Yamamoto K, Ohsumi A, Kojima F, et al. Long-term survival after video-assisted thoracic  
26  
27  
28 surgery lobectomy for primary lung cancer. *Ann Thorac Surg.* 2010;89:353-9.  
29  
30  
31  
32  
33  
34  
35  
36  
37  
38  
39  
40  
41  
42  
43  
44  
45  
46  
47  
48  
49  
50  
51  
52  
53  
54  
55  
56  
57  
58  
59  
60



## Tables

Table 1: Patient demographics

|                                      | Before matching    |                    |      | After matching     |                    |      |
|--------------------------------------|--------------------|--------------------|------|--------------------|--------------------|------|
|                                      | EA (N=1799)        | Non-EA (N=392)     | SD   | EA (N=372)         | Non-EA (N=372)     | SD   |
| Age, year                            | 64 ± 11            | 64 ± 11            | 0.1  | 64 ± 12            | 64 ± 11            | 5.8  |
| Sex, male                            | 918 (51.0%)        | 194 (49.5%)        | 3.1  | 192 (51.6%)        | 183 (49.2%)        | 4.8  |
| ASA physical status ≥ 3              | 424 (23.6%)        | 109 (27.8%)        | 9.7  | 104 (28.0%)        | 100 (26.9%)        | 2.4  |
| ECOG PS ≥ 1                          | 549 (30.5%)        | 130 (33.2%)        | 5.7  | 132 (35.5%)        | 117 (31.5%)        | 8.6  |
| <b>Comorbidities</b>                 |                    |                    |      |                    |                    |      |
| COPD                                 | 474 (26.3%)        | 107 (27.3%)        | 2.1  | 102 (27.4%)        | 100 (26.9%)        | 1.2  |
| Diabetes                             | 297 (16.5%)        | 56 (14.3%)         | 6.2  | 56 (15.1%)         | 52 (14.0%)         | 3.1  |
| Coronary artery disease              | 171 (9.5%)         | 41 (10.5%)         | 3.2  | 41 (11.0%)         | 39 (10.5%)         | 1.7  |
| Heart failure                        | 74 (4.1%)          | 21 (5.4%)          | 5.9  | 15 (4.0%)          | 19 (5.1%)          | 5.2  |
| Stroke                               | 60 (3.3%)          | 18 (4.6%)          | 6.4  | 25 (6.7%)          | 17 (4.6%)          | 9.3  |
| Chronic kidney disease               | 141 (7.8%)         | 35 (8.9%)          | 3.9  | 25 (6.7%)          | 31 (8.3%)          | 6.1  |
| <b>Pulmonary function test</b>       |                    |                    |      |                    |                    |      |
| FVC, liter                           | 2.88 ± 0.76        | 2.81 ± 0.73        | 9.5  | 2.83 ± 0.76        | 2.82 ± 0.73        | 1.9  |
| % predicted                          | 87.6 ± 15.7        | 85.9 ± 15.6        | 10.8 | 87.1 ± 16.3        | 86.1 ± 15.6        | 6.4  |
| FEV1, liter                          | 2.22 ± 0.62        | 2.15 ± 0.60        | 12.3 | 2.17 ± 0.62        | 2.16 ± 0.59        | 2.8  |
| % predicted                          | 86.3 ± 16.4        | 83.8 ± 16.6        | 15.5 | 85.4 ± 16.3        | 84.1 ± 16.4        | 7.8  |
| Pretreatment CEA, µg·L <sup>-1</sup> | 2.4 (1.8 – 3.7)    | 2.6 (1.7 – 4.2)    | 8.5  | 2.5 (1.7 – 4.0)    | 2.6 (1.7 – 4.2)    | 2.0  |
| <b>Surgeon experience</b>            |                    |                    |      |                    |                    |      |
|                                      |                    |                    | 1.2  |                    |                    | 0.6  |
| Specialist < 20 years                | 701 (39.0%)        | 155 (39.5%)        |      | 141 (37.9%)        | 142 (38.2%)        |      |
| Specialist ≥ 20 years                | 1098 (61.0%)       | 237 (60.5%)        |      | 231 (62.1%)        | 230 (61.8%)        |      |
| <b>Thoracoscopic surgery</b>         |                    |                    |      |                    |                    |      |
|                                      | 1199 (66.6%)       | 322 (82.1%)        | 36.1 | 292 (78.5%)        | 305 (82.0%)        | 8.8  |
| <b>Anesthesiologist experience</b>   |                    |                    |      |                    |                    |      |
|                                      |                    |                    | 3.9  |                    |                    | 10.8 |
| Specialist < 15 years                | 810 (45.0%)        | 169 (43.1%)        |      | 183 (49.2%)        | 163 (43.8%)        |      |
| Specialist ≥ 15 years                | 989 (55.0%)        | 223 (56.9%)        |      | 189 (50.8%)        | 209 (56.2%)        |      |
| <b>Anaesthesia time, min</b>         |                    |                    |      |                    |                    |      |
|                                      | 315 (265 – 360)    | 300 (240 – 368)    | 8.4  | 300 (240 – 360)    | 300 (240 – 360)    | 1.4  |
| <b>pRBC transfusion</b>              |                    |                    |      |                    |                    |      |
|                                      | 203 (11.3%)        | 52 (13.3%)         | 6.0  | 51 (13.7%)         | 49 (13.2%)         | 1.6  |
| <b>Year of Procedure</b>             |                    |                    |      |                    |                    |      |
|                                      |                    |                    | 25.7 |                    |                    | 5.7  |
| 2005 – 2009                          | 627 (34.9%)        | 69 (17.6%)         |      | 74 (19.9%)         | 67 (18.0%)         |      |
| 2010 – 2012                          | 517 (28.7%)        | 157 (40.1%)        |      | 148 (39.8%)        | 145 (39.0%)        |      |
| 2013 – 2015                          | 655 (36.4%)        | 166 (42.3%)        |      | 150 (40.3%)        | 160 (43.0%)        |      |
| <b>Preoperative C/T ± R/T</b>        |                    |                    |      |                    |                    |      |
|                                      | 77 (4.3%)          | 21 (5.4%)          | 5.0  | 17 (4.6%)          | 20 (5.4%)          | 3.7  |
| <b>Postoperative C/T</b>             |                    |                    |      |                    |                    |      |
|                                      | 834 (46.4%)        | 163 (41.6%)        | 9.6  | 151 (40.6%)        | 158 (42.5%)        | 3.8  |
| <b>Postoperative R/T</b>             |                    |                    |      |                    |                    |      |
|                                      | 98 (5.4%)          | 22 (5.6%)          | 0.7  | 26 (7.0%)          | 21 (5.6%)          | 5.5  |
| <b>Follow-up time, month</b>         |                    |                    |      |                    |                    |      |
|                                      | 43.5 (25.3 – 72.4) | 39.4 (21.9 – 59.9) | 20.4 | 40.3 (24.4 – 62.2) | 39.6 (21.9 – 59.8) | 8.8  |

Values were mean ± SD, counts (percent), or median (interquartile range). Continuous variables are analysed with Wilcoxon rank-sum tests; categorical variables are analysed with Pearson chi-square tests. SD: standardized difference is the difference in mean, proportion or rank divided by the pooled standard error, expressed as percentage; imbalance is defined as absolute value greater than 20 (small effect size). ASA: American Society of Anesthesiologists; ECOG PS: Eastern Cooperative Oncology Group performance score; COPD: chronic obstructive pulmonary disease; FVC: forced vital capacity; FEV1: forced expiratory volume in one second; CEA: carcinoembryonic antigen; pRBC: packed red blood cell; C/T: chemotherapy; R/T: radiotherapy.

Table 2: Cancer stages and pathologic features

|                            | Before matching |                |      | After matching |                |     |
|----------------------------|-----------------|----------------|------|----------------|----------------|-----|
|                            | EA (N=1799)     | Non-EA (N=392) | SD   | EA (N=372)     | Non-EA (N=372) | SD  |
| <b>AJCC stage</b>          |                 |                | 2.0  |                |                | 1.8 |
| Stage I                    | 1316 (73.2%)    | 289 (73.7%)    |      | 271 (72.8%)    | 276 (74.2%)    |     |
| IA                         | 546 (30.4%)     | 116 (29.6%)    |      | 114 (30.7%)    | 110 (29.6%)    |     |
| IB                         | 770 (42.8%)     | 173 (44.1%)    |      | 157 (42.2%)    | 166 (44.6%)    |     |
| Stage II                   | 205 (11.4%)     | 52 (13.3%)     |      | 55 (14.8%)     | 48 (12.9%)     |     |
| IIA                        | 106 (5.9%)      | 26 (6.6%)      |      | 32 (8.6%)      | 24 (6.5%)      |     |
| IIB                        | 99 (5.5%)       | 26 (6.6%)      |      | 23 (6.2%)      | 24 (6.5%)      |     |
| Stage III                  | 278 (15.5%)     | 51 (13.0%)     |      | 46 (12.4%)     | 48 (12.9%)     |     |
| IIIA                       | 253 (14.1%)     | 46 (11.7%)     |      | 42 (11.3%)     | 44 (11.8%)     |     |
| IIIB                       | 25 (1.4%)       | 5 (1.3%)       |      | 4 (1.1%)       | 4 (1.1%)       |     |
| <b>Pathologic features</b> |                 |                |      |                |                |     |
| Subtype                    |                 |                | 6.8  |                |                | 5.1 |
| Adenocarcinoma             | 1511 (84.0%)    | 314 (80.1%)    |      | 292 (78.5%)    | 303 (81.5%)    |     |
| SCC                        | 200 (11.1%)     | 54 (13.8%)     |      | 54 (14.5%)     | 46 (12.4%)     |     |
| Other                      | 88 (4.9%)       | 24 (6.1%)      |      | 26 (7.0%)      | 23 (6.2%)      |     |
| Tumour differentiation     |                 |                | 5.3  |                |                | 1.8 |
| Good                       | 181 (10.1%)     | 46 (11.7%)     |      | 39 (10.5%)     | 46 (12.4%)     |     |
| Moderate                   | 1100 (61.2%)    | 215 (54.8%)    |      | 209 (56.2%)    | 201 (54.0%)    |     |
| Poor                       | 516 (28.7%)     | 131 (33.4%)    |      | 124 (33.3%)    | 125 (33.6%)    |     |
| Microscopic necrosis       | 388 (21.6%)     | 77 (19.6%)     | 4.8  | 77 (20.7%)     | 71 (19.1%)     | 4.0 |
| Lymphocytic infiltration   | 189 (10.5%)     | 27 (6.9%)      | 12.9 | 34 (9.1%)      | 27 (7.3%)      | 6.9 |
| Lymphovascular invasion    | 497 (27.6%)     | 127 (32.4%)    | 10.4 | 115 (30.9%)    | 118 (31.7%)    | 1.7 |
| Perineural infiltration    | 58 (3.2%)       | 12 (3.1%)      | 0.9  | 10 (2.7%)      | 11 (3.0%)      | 1.6 |

Values were counts (percent). Categorical variables are analysed with Pearson chi-square tests or Mann-Whitney U tests, as appropriate. SD: standardized difference is the difference in mean, proportion or rank divided by the pooled standard error, expressed as percentage; imbalance is defined as absolute value greater than 20 (small effect size). AJCC: American Joint Committee on Cancer; SCC: squamous cell carcinoma.

Table 3: Multivariable analysis for cancer recurrence and all-cause mortality after model selection

|                                | Cancer recurrence |                |          | All-cause mortality           |          |                |       |
|--------------------------------|-------------------|----------------|----------|-------------------------------|----------|----------------|-------|
|                                | HR                | 95% C.I.       | <i>p</i> | HR                            | 95% C.I. | <i>p</i>       |       |
| <b>EA vs. non-EA</b>           | 0.927             | 0.755 – 1.139  | 0.473    | <b>EA vs. non-EA</b>          | 0.811    | 0.582 – 1.129  | 0.214 |
| <b>Sex (M vs. F)</b>           | 1.297             | 1.026 – 1.642  | 0.030    | <b>Sex (M vs. F)</b>          | 1.969    | 1.344 – 2.882  | 0.001 |
| <b>Pretreatment CEA*</b>       | 1.263             | 1.046 – 1.524  | 0.015    | <b>ECOG PS ≥ 1</b>            | 1.494    | 1.105 – 2.019  | 0.009 |
| <b>Postoperative C/T</b>       | 1.456             | 1.187 – 1.786  | <.001    | <b>Pretreatment CEA*</b>      | 1.672    | 1.221 – 2.290  | 0.001 |
| <b>Postoperative R/T</b>       | 1.443             | 1.126 – 1.849  | 0.004    | <b>pRBC transfusion</b>       | 1.402    | 1.008 – 1.948  | 0.045 |
| <b>Stage</b>                   |                   |                | <.001    | <b>Postoperative R/T</b>      | 1.810    | 1.271 – 2.578  | 0.001 |
| II vs. I                       | 1.927             | 1.521 – 2.440  | <.001    | <b>Stage</b>                  |          |                | <.001 |
| III vs. I                      | 2.848             | 2.265 – 3.581  | <.001    | II vs. I                      | 2.059    | 1.388 – 3.054  | <.001 |
| <b>Tumour differentiation</b>  |                   |                | <.001    | III vs. I                     | 2.964    | 2.032 – 4.323  | <.001 |
| Moderate vs. good              | 3.752             | 1.919 – 7.338  | <.001    | <b>Tumour differentiation</b> |          |                | 0.014 |
| Poor vs. good                  | 5.198             | 2.632 – 10.265 | <.001    | Moderate vs. good             | 4.718    | 1.153 – 19.310 | 0.031 |
| <b>Microscopic necrosis</b>    | 1.444             | 1.203 – 1.733  | <.001    | Poor vs. good                 | 6.169    | 1.487 – 25.587 | 0.012 |
| <b>Lymphovascular invasion</b> | 2.053             | 1.717 – 2.456  | <.001    | <b>Microscopic necrosis</b>   | 1.378    | 1.037 – 1.831  | 0.027 |

HR: hazard ratio; EA: epidural analgesia; M: male, F: female; CEA: carcinoembryonic antigen; C/T: chemotherapy; R/T: radiotherapy; ECOG PS: Eastern Cooperative Oncology Group performance score; pRBC: packed red blood cell.

\* On base-10 logarithmic scale

## Figures and Legends

**Figure 1: Flow diagram for patient inclusion.**

**Figure 2: Unadjusted Kaplan–Meier curves for recurrence-free and overall survival of epidural and non- epidural groups**

No significant difference in recurrence-free survival (A and B) or overall survival (C and D) after surgery for non-small-cell lung cancer was noted when comparing epidural with non-epidural group as a whole or stratified by cancer stage.

1  
2  
3  
4  
5  
6  
7  
8  
9  
10  
11  
12  
13  
14  
15  
16  
17  
18  
19  
20  
21  
22  
23  
24  
25  
26  
27  
28  
29  
30  
31  
32  
33  
34  
35  
36  
37  
38  
39  
40  
41  
42  
43  
44  
45  
46  
47  
48  
49  
50  
51  
52  
53  
54  
55  
56  
57  
58  
59  
60



Figure 1: Flow diagram for patient inclusion.

254x190mm (300 x 300 DPI)

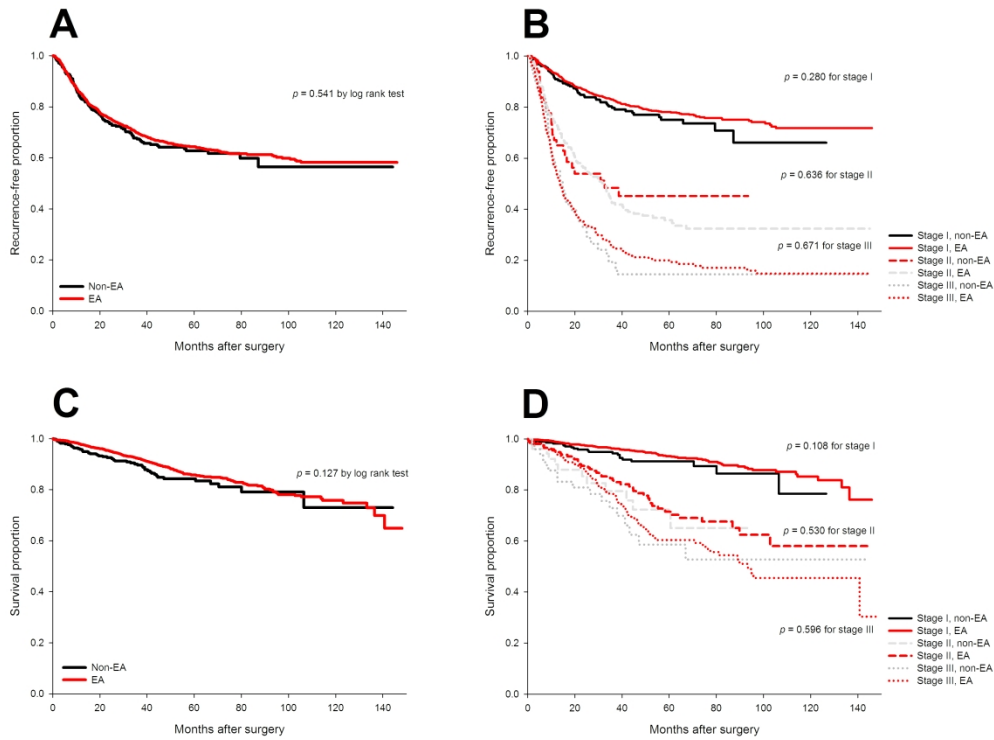

Figure 2: Unadjusted Kaplan–Meier curves for recurrence-free and overall survival of epidural and non-epidural groups

No significant difference in recurrence-free survival (A and B) or overall survival (C and D) after surgery for non-small-cell lung cancer was noted when comparing epidural with non-epidural group as a whole or stratified by cancer stage.

352x260mm (300 x 300 DPI)

**Supplementary Table 1: Postoperative follow-up in this study**

| <b>Year after Surgery</b>   | <b>No. of Patients under Follow-up</b> | <b>No. of Patients Lost to Follow-up*</b> | <b>No. of Mortality</b> | <b>No. of All Patients</b> | <b>Follow-up Rate (%)**</b> |
|-----------------------------|----------------------------------------|-------------------------------------------|-------------------------|----------------------------|-----------------------------|
| <b>1<sup>st</sup> year</b>  | 2031                                   | 103                                       | 57                      | 2191                       | 95.3                        |
| <b>2<sup>nd</sup> year</b>  | 1846                                   | 239                                       | 106                     | 2191                       | 89.1                        |
| <b>3<sup>rd</sup> year</b>  | 1400                                   | 196                                       | 134                     | 1730                       | 88.7                        |
| <b>4<sup>th</sup> year</b>  | 1066                                   | 238                                       | 163                     | 1467                       | 83.8                        |
| <b>5<sup>th</sup> year</b>  | 807                                    | 262                                       | 168                     | 1237                       | 78.8                        |
| <b>6<sup>th</sup> year</b>  | 589                                    | 262                                       | 151                     | 1002                       | 73.9                        |
| <b>7<sup>th</sup> year</b>  | 399                                    | 241                                       | 139                     | 779                        | 69.1                        |
| <b>8<sup>th</sup> year</b>  | 260                                    | 187                                       | 123                     | 570                        | 67.2                        |
| <b>9<sup>th</sup> year</b>  | 192                                    | 165                                       | 105                     | 462                        | 64.3                        |
| <b>10<sup>th</sup> year</b> | 109                                    | 142                                       | 81                      | 332                        | 57.2                        |
| <b>11<sup>th</sup> year</b> | 53                                     | 101                                       | 53                      | 207                        | 51.2                        |
| <b>12<sup>th</sup> year</b> | 13                                     | 35                                        | 15                      | 63                         | 44.4                        |

\* Loss to follow-up is defined as lost contact beyond 3, 6, and 12 months in the first, second, and third year after surgery, respectively.

\*\* Follow-up rate = (number of all patients – number of patients lost to follow-up) / number of all patients

**Supplementary Table 2: Logistic regression analysis for propensity score matching**

|                                                                                | <b>OR</b> | <b>95% C.I.</b> | <b>p</b>  |
|--------------------------------------------------------------------------------|-----------|-----------------|-----------|
| <b>Age</b>                                                                     | 1.015     | 1.001 – 1.029   | 0.036     |
| <b>Sex (F vs. M)</b>                                                           | 1.166     | 0.817 – 1.665   | 0.397     |
| <b>ASA physical status <math>\geq 3</math></b>                                 | 0.834     | 0.618 – 1.125   | 0.235     |
| <b>ECOG PS <math>\geq 1</math></b>                                             | 0.823     | 0.599 – 1.130   | 0.228     |
| <b>COPD</b>                                                                    | 1.137     | 0.823 – 1.571   | 0.437     |
| <b>Diabetes</b>                                                                | 1.285     | 0.913 – 1.807   | 0.150     |
| <b>Coronary artery disease</b>                                                 | 0.990     | 0.653 – 1.500   | 0.961     |
| <b>Heart failure</b>                                                           | 0.942     | 0.539 – 1.644   | 0.832     |
| <b>Stroke</b>                                                                  | 0.825     | 0.462 – 1.474   | 0.515     |
| <b>Chronic kidney disease</b>                                                  | 1.161     | 0.744 – 1.813   | 0.510     |
| <b>FVC</b>                                                                     | 0.862     | 0.578 – 1.285   | 0.466     |
| <b>FEV1</b>                                                                    | 1.649     | 1.016 – 2.678   | 0.043     |
| <b>Pretreatment CEA *</b>                                                      | 0.716     | 0.513 – 0.999   | 0.049     |
| <b>Thoracoscopic surgery</b>                                                   | 0.591     | 0.389 – 0.898   | 0.014     |
| <b>Anaesthesia time **</b>                                                     | 1.282     | 0.924 – 1.778   | 0.137     |
| <b>pRBC transfusion</b>                                                        | 0.739     | 0.507 – 1.079   | 0.117     |
| <b>Postoperative CT</b>                                                        | 1.269     | 0.957 – 1.682   | 0.098     |
| <b>Postoperative RT</b>                                                        | 0.879     | 0.513 – 1.508   | 0.640     |
| <b>Preoperative C/T <math>\pm</math> R/T</b>                                   | 0.722     | 0.405 – 1.286   | 0.269     |
| <b>Cancer stage I (reference)</b>                                              |           |                 | 0.568     |
| Stage II                                                                       | 1.039     | 0.690 – 1.564   | 0.854     |
| Stage III                                                                      | 1.260     | 0.815 – 1.950   | 0.299     |
| <b>Well-differentiated tumour (reference)</b>                                  |           |                 | 0.078     |
| Moderately-differentiated tumour                                               | 1.294     | 0.881 – 1.902   | 0.189     |
| Poorly-differentiated tumour                                                   | 0.965     | 0.622 – 1.498   | 0.875     |
| <b>Microscopic necrosis</b>                                                    | 1.247     | 0.890 – 1.749   | 0.200     |
| <b>Lymphocytic infiltration</b>                                                | 0.995     | 0.628 – 1.578   | 0.985     |
| <b>Lymphovascular invasion</b>                                                 | 0.830     | 0.612 – 1.127   | 0.233     |
| <b>Perineural invasion</b>                                                     | 1.288     | 0.639 – 2.597   | 0.480     |
| <b>Surgeon (<math>\geq 20</math> vs. <math>&lt; 20</math> years)</b>           | 1.137     | 0.887 – 1.458   | 0.312     |
| <b>Anaesthesiologist (<math>\geq 15</math> vs. <math>&lt; 15</math> years)</b> | 1.073     | 0.848 – 1.356   | 0.559     |
| <b>Year of procedure</b>                                                       |           |                 | 0.001     |
| 2012 – 2010 vs. 2005 – 2009                                                    | 0.455     | 0.295 – 0.701   | $< 0.001$ |
| 2015 – 2013 vs. 2005 – 2009                                                    | 0.621     | 0.388 – 0.996   | 0.048     |

OR: odds ratio; F: female, M: male; ASA: American Society of Anesthesiologists; ECOG PS: Eastern Cooperative Oncology Group performance score; COPD: chronic obstructive pulmonary disease; FVC: forced vital capacity; FEV1: forced expiratory volume in one second; CEA: carcinoembryonic antigen; pRBC: packed red blood cell; C/T: chemotherapy; R/T: radiotherapy. \* On base-10 logarithmic scale; \*\* On base-2 logarithmic scale



**Supplementary Table 3:** Frequency and proportion of epidural placement and thoracoscopic surgery in each year of procedure

| Year of Procedure | Epidural Analgesia |            | Thoracoscopic Surgery |            |
|-------------------|--------------------|------------|-----------------------|------------|
|                   | Frequency          | Proportion | Frequency             | Proportion |
| 2005              | 135 / 146          | 92.5%      | 8 / 146               | 5.5%       |
| 2006              | 130 / 139          | 93.5%      | 8 / 139               | 5.8%       |
| 2007              | 122 / 132          | 92.4%      | 9 / 132               | 6.8%       |
| 2008              | 108 / 124          | 87.1%      | 29 / 124              | 23.4%      |
| 2009              | 132 / 155          | 85.2%      | 78 / 155              | 50.3%      |
| 2010              | 166 / 221          | 75.1%      | 158 / 221             | 71.5%      |
| 2011              | 173 / 229          | 75.5%      | 210 / 229             | 91.7%      |
| 2012              | 178 / 224          | 79.5%      | 213 / 224             | 95.1%      |
| 2013              | 194 / 240          | 80.8%      | 234 / 240             | 97.5%      |
| 2014              | 236 / 297          | 79.5%      | 293 / 297             | 98.7%      |
| 2015              | 225 / 284          | 79.2%      | 281 / 284             | 98.9%      |
| <b>Overall</b>    | 1799 / 2191        | 82.1%      | 1521 / 2191           | 69.4%      |

The proportion of epidural analgesia decreased as more thoracoscopic surgeries were performed in the tumour resection of lung cancer in the period of study.

# Reporting checklist for cohort study.

Based on the STROBE cohort guidelines.

## Instructions to authors

Complete this checklist by entering the page numbers from your manuscript where readers will find each of the items listed below.

Your article may not currently address all the items on the checklist. Please modify your text to include the missing information. If you are certain that an item does not apply, please write "n/a" and provide a short explanation.

Upload your completed checklist as an extra file when you submit to a journal.

In your methods section, say that you used the STROBE cohort reporting guidelines, and cite them as:

von Elm E, Altman DG, Egger M, Pocock SJ, Gøtzsche PC, Vandenbroucke JP. The Strengthening the Reporting of Observational Studies in Epidemiology (STROBE) Statement: guidelines for reporting observational studies.

|                        |     | Reporting Item                                                                                                                           | Page Number |
|------------------------|-----|------------------------------------------------------------------------------------------------------------------------------------------|-------------|
| Title                  | #1a | Indicate the study's design with a commonly used term in the title or the abstract                                                       | 1           |
| Abstract               | #1b | Provide in the abstract an informative and balanced summary of what was done and what was found                                          | 2-3         |
| Background / rationale | #2  | Explain the scientific background and rationale for the investigation being reported                                                     | 5-6         |
| Objectives             | #3  | State specific objectives, including any prespecified hypotheses                                                                         | 5-6         |
| Study design           | #4  | Present key elements of study design early in the paper                                                                                  | 7           |
| Setting                | #5  | Describe the setting, locations, and relevant dates, including periods of recruitment, exposure, follow-up, and data collection          | 7           |
| Eligibility criteria   | #6a | Give the eligibility criteria, and the sources and methods of selection of participants. Describe methods of follow-up.                  | 7           |
|                        | #6b | For matched studies, give matching criteria and number of exposed and unexposed                                                          | 7-10        |
| Variables              | #7  | Clearly define all outcomes, exposures, predictors, potential confounders, and effect modifiers. Give diagnostic criteria, if applicable | 8-11        |
| Data sources /         | #8  | For each variable of interest give sources of data and details of methods of assessment                                                  | 8-11        |

For peer review only - <http://bmjopen.bmj.com/site/about/guidelines.xhtml>

|    |                     |      |                                                                                                       |          |
|----|---------------------|------|-------------------------------------------------------------------------------------------------------|----------|
| 1  | measurement         |      | (measurement). Describe comparability of assessment methods if there is more than one group.          |          |
| 2  |                     |      | Give information separately for for exposed and unexposed groups if applicable.                       |          |
| 3  |                     |      |                                                                                                       |          |
| 4  | Bias                | #9   | Describe any efforts to address potential sources of bias                                             | 17-18    |
| 5  |                     |      |                                                                                                       |          |
| 6  | Study size          | #10  | Explain how the study size was arrived at                                                             | 12       |
| 7  |                     |      |                                                                                                       |          |
| 8  | Quantitative        | #11  | Explain how quantitative variables were handled in the analyses. If applicable, describe which        | 7, 10-11 |
| 9  | variables           |      | groupings were chosen, and why                                                                        |          |
| 10 |                     |      |                                                                                                       |          |
| 11 |                     |      |                                                                                                       |          |
| 12 | Statistical methods | #12a | Describe all statistical methods, including those used to control for confounding                     | 10-11    |
| 13 |                     |      |                                                                                                       |          |
| 14 |                     | #12b | Describe any methods used to examine subgroups and interactions                                       | 10-11    |
| 15 |                     |      |                                                                                                       |          |
| 16 |                     | #12c | Explain how missing data were addressed                                                               | 10-11    |
| 17 |                     |      |                                                                                                       |          |
| 18 |                     | #12d | If applicable, explain how loss to follow-up was addressed                                            | 10-11    |
| 19 |                     |      |                                                                                                       |          |
| 20 |                     | #12e | Describe any sensitivity analyses                                                                     | 10-11    |
| 21 |                     |      |                                                                                                       |          |
| 22 | Participants        | #13a | Report numbers of individuals at each stage of study—eg numbers potentially eligible,                 | 12       |
| 23 |                     |      | examined for eligibility, confirmed eligible, included in the study, completing follow-up, and        |          |
| 24 |                     |      | analysed. Give information separately for for exposed and unexposed groups if applicable.             |          |
| 25 |                     |      |                                                                                                       |          |
| 26 |                     | #13b | Give reasons for non-participation at each stage                                                      | 12       |
| 27 |                     |      |                                                                                                       |          |
| 28 |                     | #13c | Consider use of a flow diagram                                                                        | 12       |
| 29 |                     |      |                                                                                                       |          |
| 30 | Descriptive data    | #14a | Give characteristics of study participants (eg demographic, clinical, social) and information on      | 12-14    |
| 31 |                     |      | exposures and potential confounders. Give information separately for exposed and unexposed            |          |
| 32 |                     |      | groups if applicable.                                                                                 |          |
| 33 |                     |      |                                                                                                       |          |
| 34 |                     | #14b | Indicate number of participants with missing data for each variable of interest                       | 12-14    |
| 35 |                     |      |                                                                                                       |          |
| 36 |                     | #14c | Summarise follow-up time (eg, average and total amount)                                               | 12-14    |
| 37 |                     |      |                                                                                                       |          |
| 38 | Outcome data        | #15  | Report numbers of outcome events or summary measures over time. Give information                      | 12-14    |
| 39 |                     |      | separately for exposed and unexposed groups if applicable.                                            |          |
| 40 |                     |      |                                                                                                       |          |
| 41 | Main results        | #16a | Give unadjusted estimates and, if applicable, confounder-adjusted estimates and their precision       | 12-14    |
| 42 |                     |      | (eg, 95% confidence interval). Make clear which confounders were adjusted for and why they            |          |
| 43 |                     |      | were included                                                                                         |          |
| 44 |                     |      |                                                                                                       |          |
| 45 |                     | #16b | Report category boundaries when continuous variables were categorized                                 | 12-14    |
| 46 |                     |      |                                                                                                       |          |
| 47 |                     | #16c | If relevant, consider translating estimates of relative risk into absolute risk for a meaningful time | 12-14    |
| 48 |                     |      | period                                                                                                |          |
| 49 |                     |      |                                                                                                       |          |
| 50 |                     |      |                                                                                                       |          |
| 51 |                     |      |                                                                                                       |          |
| 52 |                     |      |                                                                                                       |          |
| 53 |                     |      |                                                                                                       |          |
| 54 |                     |      |                                                                                                       |          |
| 55 |                     |      |                                                                                                       |          |
| 56 |                     |      |                                                                                                       |          |
| 57 |                     |      |                                                                                                       |          |
| 58 |                     |      |                                                                                                       |          |
| 59 |                     |      |                                                                                                       |          |
| 60 |                     |      |                                                                                                       |          |

|    |                  |     |                                                                                                                                                                  |       |
|----|------------------|-----|------------------------------------------------------------------------------------------------------------------------------------------------------------------|-------|
| 1  | Other analyses   | #17 | Report other analyses done—e.g., analyses of subgroups and interactions, and sensitivity analyses                                                                | 12-14 |
| 2  |                  |     |                                                                                                                                                                  |       |
| 3  |                  |     |                                                                                                                                                                  |       |
| 4  |                  |     |                                                                                                                                                                  |       |
| 5  | Key results      | #18 | Summarise key results with reference to study objectives                                                                                                         | 15    |
| 6  |                  |     |                                                                                                                                                                  |       |
| 7  | Limitations      | #19 | Discuss limitations of the study, taking into account sources of potential bias or imprecision. Discuss both direction and magnitude of any potential bias.      | 17-18 |
| 8  |                  |     |                                                                                                                                                                  |       |
| 9  |                  |     |                                                                                                                                                                  |       |
| 10 |                  |     |                                                                                                                                                                  |       |
| 11 | Interpretation   | #20 | Give a cautious overall interpretation considering objectives, limitations, multiplicity of analyses, results from similar studies, and other relevant evidence. | 15-18 |
| 12 |                  |     |                                                                                                                                                                  |       |
| 13 |                  |     |                                                                                                                                                                  |       |
| 14 |                  |     |                                                                                                                                                                  |       |
| 15 | Generalisability | #21 | Discuss the generalisability (external validity) of the study results                                                                                            | 17-18 |
| 16 |                  |     |                                                                                                                                                                  |       |
| 17 | Funding          | #22 | Give the source of funding and the role of the funders for the present study and, if applicable, for the original study on which the present article is based    | 19    |
| 18 |                  |     |                                                                                                                                                                  |       |
| 19 |                  |     |                                                                                                                                                                  |       |
| 20 |                  |     |                                                                                                                                                                  |       |

21 The STROBE checklist is distributed under the terms of the Creative Commons Attribution License CC-BY. This checklist was completed  
22 on 31. October 2018 using <http://www.goodreports.org/>, a tool made by the [EQUATOR Network](#) in collaboration with [Penelope.ai](#)  
23  
24  
25  
26  
27  
28  
29  
30  
31  
32  
33  
34  
35  
36  
37  
38  
39  
40  
41  
42  
43  
44  
45  
46  
47  
48  
49  
50  
51  
52  
53  
54  
55  
56  
57  
58  
59  
60
