# Supplementary material for: Effects of epidural analgesia on cancer recurrence and long-term mortality in patients after non-small-cell lung cancer resection: a propensity score-matched study
Source: PubMed Central journal article supplement — BMJ Open. 2019 May 30;9(5):e027618. doi: 10.1136/bmjopen-2018-027618 (PMC6549742; doi:10.1136/bmjopen-2018-027618), 2019-05-30
Supplement: bmjopen-2018-027618supp001.pdf [file bmjopen-2018-027618supp001.pdf]

**Supplementary Table 1: Postoperative follow-up in this study**

| <b>Year after Surgery</b>   | <b>No. of Patients under Follow-up</b> | <b>No. of Patients Lost to Follow-up*</b> | <b>No. of Mortality</b> | <b>No. of All Patients</b> | <b>Follow-up Rate (%)**</b> |
|-----------------------------|----------------------------------------|-------------------------------------------|-------------------------|----------------------------|-----------------------------|
| <b>1<sup>st</sup> year</b>  | 2031                                   | 103                                       | 57                      | 2191                       | 95.3                        |
| <b>2<sup>nd</sup> year</b>  | 1846                                   | 239                                       | 106                     | 2191                       | 89.1                        |
| <b>3<sup>rd</sup> year</b>  | 1400                                   | 196                                       | 134                     | 1730                       | 88.7                        |
| <b>4<sup>th</sup> year</b>  | 1066                                   | 238                                       | 163                     | 1467                       | 83.8                        |
| <b>5<sup>th</sup> year</b>  | 807                                    | 262                                       | 168                     | 1237                       | 78.8                        |
| <b>6<sup>th</sup> year</b>  | 589                                    | 262                                       | 151                     | 1002                       | 73.9                        |
| <b>7<sup>th</sup> year</b>  | 399                                    | 241                                       | 139                     | 779                        | 69.1                        |
| <b>8<sup>th</sup> year</b>  | 260                                    | 187                                       | 123                     | 570                        | 67.2                        |
| <b>9<sup>th</sup> year</b>  | 192                                    | 165                                       | 105                     | 462                        | 64.3                        |
| <b>10<sup>th</sup> year</b> | 109                                    | 142                                       | 81                      | 332                        | 57.2                        |
| <b>11<sup>th</sup> year</b> | 53                                     | 101                                       | 53                      | 207                        | 51.2                        |
| <b>12<sup>th</sup> year</b> | 13                                     | 35                                        | 15                      | 63                         | 44.4                        |

\* Loss to follow-up is defined as lost contact beyond 3, 6, and 12 months in the first, second, and third year after surgery, respectively.

\*\* Follow-up rate = (number of all patients – number of patients lost to follow-up) / number of all patients

**Supplementary Table 2: Logistic regression analysis for propensity score matching**

|                                                                                | <b>OR</b> | <b>95% C.I.</b> | <b>p</b>  |
|--------------------------------------------------------------------------------|-----------|-----------------|-----------|
| <b>Age</b>                                                                     | 1.015     | 1.001 – 1.029   | 0.036     |
| <b>Sex (F vs. M)</b>                                                           | 1.166     | 0.817 – 1.665   | 0.397     |
| <b>ASA physical status <math>\geq 3</math></b>                                 | 0.834     | 0.618 – 1.125   | 0.235     |
| <b>ECOG PS <math>\geq 1</math></b>                                             | 0.823     | 0.599 – 1.130   | 0.228     |
| <b>COPD</b>                                                                    | 1.137     | 0.823 – 1.571   | 0.437     |
| <b>Diabetes</b>                                                                | 1.285     | 0.913 – 1.807   | 0.150     |
| <b>Coronary artery disease</b>                                                 | 0.990     | 0.653 – 1.500   | 0.961     |
| <b>Heart failure</b>                                                           | 0.942     | 0.539 – 1.644   | 0.832     |
| <b>Stroke</b>                                                                  | 0.825     | 0.462 – 1.474   | 0.515     |
| <b>Chronic kidney disease</b>                                                  | 1.161     | 0.744 – 1.813   | 0.510     |
| <b>FVC</b>                                                                     | 0.862     | 0.578 – 1.285   | 0.466     |
| <b>FEV1</b>                                                                    | 1.649     | 1.016 – 2.678   | 0.043     |
| <b>Pretreatment CEA *</b>                                                      | 0.716     | 0.513 – 0.999   | 0.049     |
| <b>Thoracoscopic surgery</b>                                                   | 0.591     | 0.389 – 0.898   | 0.014     |
| <b>Anaesthesia time **</b>                                                     | 1.282     | 0.924 – 1.778   | 0.137     |
| <b>pRBC transfusion</b>                                                        | 0.739     | 0.507 – 1.079   | 0.117     |
| <b>Postoperative CT</b>                                                        | 1.269     | 0.957 – 1.682   | 0.098     |
| <b>Postoperative RT</b>                                                        | 0.879     | 0.513 – 1.508   | 0.640     |
| <b>Preoperative C/T <math>\pm</math> R/T</b>                                   | 0.722     | 0.405 – 1.286   | 0.269     |
| <b>Cancer stage I (reference)</b>                                              |           |                 | 0.568     |
| Stage II                                                                       | 1.039     | 0.690 – 1.564   | 0.854     |
| Stage III                                                                      | 1.260     | 0.815 – 1.950   | 0.299     |
| <b>Well-differentiated tumour (reference)</b>                                  |           |                 | 0.078     |
| Moderately-differentiated tumour                                               | 1.294     | 0.881 – 1.902   | 0.189     |
| Poorly-differentiated tumour                                                   | 0.965     | 0.622 – 1.498   | 0.875     |
| <b>Microscopic necrosis</b>                                                    | 1.247     | 0.890 – 1.749   | 0.200     |
| <b>Lymphocytic infiltration</b>                                                | 0.995     | 0.628 – 1.578   | 0.985     |
| <b>Lymphovascular invasion</b>                                                 | 0.830     | 0.612 – 1.127   | 0.233     |
| <b>Perineural invasion</b>                                                     | 1.288     | 0.639 – 2.597   | 0.480     |
| <b>Surgeon (<math>\geq 20</math> vs. <math>&lt; 20</math> years)</b>           | 1.137     | 0.887 – 1.458   | 0.312     |
| <b>Anaesthesiologist (<math>\geq 15</math> vs. <math>&lt; 15</math> years)</b> | 1.073     | 0.848 – 1.356   | 0.559     |
| <b>Year of procedure</b>                                                       |           |                 | 0.001     |
| 2012 – 2010 vs. 2005 – 2009                                                    | 0.455     | 0.295 – 0.701   | $< 0.001$ |
| 2015 – 2013 vs. 2005 – 2009                                                    | 0.621     | 0.388 – 0.996   | 0.048     |

OR: odds ratio; F: female, M: male; ASA: American Society of Anesthesiologists; ECOG PS: Eastern Cooperative Oncology Group performance score; COPD: chronic obstructive pulmonary disease; FVC: forced vital capacity; FEV1: forced expiratory volume in one second; CEA: carcinoembryonic antigen; pRBC: packed red blood cell; C/T: chemotherapy; R/T: radiotherapy. \* On base-10 logarithmic scale; \*\* On base-2 logarithmic scale

**Supplementary Table 3:** Frequency and proportion of epidural placement and thoracoscopic surgery in each year of procedure

| <b>Year of Procedure</b> | <b>Epidural Analgesia</b> |                   | <b>Thoracoscopic Surgery</b> |                   |
|--------------------------|---------------------------|-------------------|------------------------------|-------------------|
|                          | <b>Frequency</b>          | <b>Proportion</b> | <b>Frequency</b>             | <b>Proportion</b> |
| <b>2005</b>              | 135 / 146                 | 92.5%             | 8 / 146                      | 5.5%              |
| <b>2006</b>              | 130 / 139                 | 93.5%             | 8 / 139                      | 5.8%              |
| <b>2007</b>              | 122 / 132                 | 92.4%             | 9 / 132                      | 6.8%              |
| <b>2008</b>              | 108 / 124                 | 87.1%             | 29 / 124                     | 23.4%             |
| <b>2009</b>              | 132 / 155                 | 85.2%             | 78 / 155                     | 50.3%             |
| <b>2010</b>              | 166 / 221                 | 75.1%             | 158 / 221                    | 71.5%             |
| <b>2011</b>              | 173 / 229                 | 75.5%             | 210 / 229                    | 91.7%             |
| <b>2012</b>              | 178 / 224                 | 79.5%             | 213 / 224                    | 95.1%             |
| <b>2013</b>              | 194 / 240                 | 80.8%             | 234 / 240                    | 97.5%             |
| <b>2014</b>              | 236 / 297                 | 79.5%             | 293 / 297                    | 98.7%             |
| <b>2015</b>              | 225 / 284                 | 79.2%             | 281 / 284                    | 98.9%             |
| <b>Overall</b>           | 1799 / 2191               | 82.1%             | 1521 / 2191                  | 69.4%             |

The proportion of epidural analgesia decreased as more thoracoscopic surgeries were performed in the tumour resection of lung cancer in the period of study.
